1 **Dopamine signaling in wake promoting clock neurons is not required for the normal**  
2 **regulation of sleep in *Drosophila***

3

4 Florencia Fernandez-Chiappe<sup>2¶</sup>, Christiane Hermann-Luibl<sup>1¶</sup>, Alina Peteranderl<sup>1</sup>, Nils Reinhard<sup>1</sup>,  
5 Marie Hieke<sup>1</sup>, Mareike Selcho<sup>1#</sup>, Ori T. Shafer<sup>3</sup>, Nara I. Muraro<sup>2</sup>, Charlotte Helfrich-Förster<sup>1\*</sup>

6

7 <sup>1</sup>Neurobiology and Genetics, Biocenter, University of Würzburg, 97074 Würzburg, Germany

8 <sup>2</sup>Instituto de Investigación en Biomedicina de Buenos Aires (IBioBA)-CONICET-Partner Institute  
9 of the Max Planck Society, Buenos Aires, Argentina

10 <sup>3</sup>Advance Science Research Center, The City University of New York, USA

11

12 <sup>¶</sup>these authors contributed equally to this work

13 <sup>#</sup>present address: Department of Animal Physiology, Institute of Biology, Leipzig University,  
14 Leipzig, Germany

15

16 Abbreviated title: Dopamine signaling to PDF neurons

17

18 Number of Pages: 42

19 Number of illustrations: 11

20 Number of Tables: 1

21

22 \*To whom all correspondence should be addressed:

23 Charlotte Helfrich-Förster

24 Neurobiology and Genetics

25 Theodor Boveri Institute

26 Biocenter

27 University of Würzburg

28 D-97074 Würzburg, Germany

29 E-mail: charlotte.foerster@biozentrum.uni-wuerzburg.de

30 **Declarations**

31 **Author contributions**

32 FF-C performed and analyzed the patch-clamp recordings, CH-L performed and analyzed the  
33 cAMP imaging and the behavioral experiments with permanent dopamine receptor  
34 knockdown, AP performed the behavioral experiments with conditional dopamine receptor  
35 knockdown, NL did the statistical analysis, MH and MS performed the histology, OTS, NIM and  
36 CH-F designed the study and supervised the experiments, CH-F analyzed the behavioral  
37 experiments with conditional dopamine receptor knockdown and wrote the paper with  
38 contributions from CH-L, OTS, NIM and MS.

39

40 **Acknowledgements and Funding**

41 This study was supported by the German Research Foundation (DFG; grant Fo207/14-1 and  
42 PA3241/2-1) to CHF and MS respectively, the Agencia Nacional de Promoción Científica y  
43 Tecnológica of Argentina (grant PICT-2015-2557) to NIM, and FOCEM-Mercosur (COF 03/11) to  
44 IBioBA, and by a National Institutes of Health NINDS grant (R01NS077933) and an NSF IOS  
45 grant (1354046) to OTS. We thank Serge Birman for providing the TH-Gal4 line and for  
46 profound discussions on dopamine effects, Jan Marek Ache for valuable discussion and editing  
47 of the manuscript, Indra Hering for help with the sleep experiments and Barbara Mühlbauer  
48 for general excellent assistance.

49

50 **Ethics approval**

51 Not applicable

52

53 **Conflict of interest**

54 Not applicable

55

56 **Abstract**

57 Dopamine is a wakefulness promoting neuromodulator in mammals and fruit flies. In  
58 *D. melanogaster*, the network of clock neurons that drives sleep/activity cycles comprises both  
59 wake and sleep promoting cell types, indicating that the sleep-wake circuitry is intimately  
60 linked to the circadian clock. The large and small ventrolateral neurons (l-LN<sub>v</sub>s and s-LN<sub>v</sub>s) have  
61 been identified as wake-promoting neurons within the clock neuron network. The l-LN<sub>v</sub>s are  
62 innervated by dopaminergic neurons, and earlier work proposed that dopamine signaling  
63 raises cAMP levels in the l-LN<sub>v</sub>s and thus induces excitatory electrical activity (action potential  
64 firing), which results in wakefulness and inhibits sleep. Here, we test this hypothesis by  
65 combining cAMP imaging and patch-clamp recordings in isolated brains. We find that  
66 dopamine application indeed increases cAMP levels and depolarizes the l-LN<sub>v</sub>s, but  
67 surprisingly, it does not result in increased firing rates. Down-regulation of the excitatory  
68 dopamine receptor, Dop1R1 in the l- and s-LN<sub>v</sub>s, but not of Dop1R2, abolished the  
69 depolarization of l-LN<sub>v</sub>s in response to dopamine. This indicates that dopamine signals via  
70 Dop1R1 to the l-LN<sub>v</sub>s. Down-regulation of Dop1R1 or Dop1R2 receptors in the l- and s-LN<sub>v</sub>s  
71 does not affect sleep. Unexpectedly, we find a moderate decrease of daytime sleep with  
72 down-regulation of Dop1R1 and of nighttime sleep with down-regulation of Dop1R2. Since the  
73 l-LN<sub>v</sub>s do not utilize Dop1R2 receptors and the s-LN<sub>v</sub>s respond also to dopamine, we conclude  
74 that the s-LN<sub>v</sub>s are responsible for the observed decrease in nighttime sleep. In summary,  
75 dopamine signaling in the wake-promoting LN<sub>v</sub>s is not required for daytime arousal, but likely  
76 promotes nighttime sleep via the s-LN<sub>v</sub>s.

77

78

79

80 **Keywords:** wakefulness, sleep, clock neurons, dopamine, cAMP, patch-clamp recording

81

82 **Significance statement**

83 In insect and mammalian brains, sleep promoting networks are intimately linked to the  
84 circadian clock, and the mechanisms underlying sleep and circadian timekeeping are  
85 evolutionarily ancient and highly conserved. Here we show that dopamine, one important  
86 sleep modulator in flies and mammals, plays surprisingly complex roles in the regulation of  
87 sleep by clock containing neurons. Dopamine inhibits neurons in a central brain sleep center to  
88 promote sleep and excites wake-promoting circadian clock neurons. It is therefore predicted  
89 to promote wakefulness through both of these networks. Nevertheless, our results reveal that  
90 dopamine acting on wake promoting clock neurons promotes sleep, revealing a previously  
91 unappreciated complexity in the dopaminergic control of sleep.

## 92 Introduction

93 The fruit fly *Drosophila melanogaster* has become a powerful and widely-used model system  
94 for sleep research (reviewed by Cirelli, 2009; Dubowy and Sehgal, 2017; Helfrich-Förster,  
95 2018). As in mammals, the sleep-like state of *Drosophila* is associated with reduced sensory  
96 responsiveness and reduced brain activity (Nitz et al., 2002; van Swinderen et al., 2004), and is  
97 subject to both circadian and homeostatic regulation (Hendricks et al., 2000; Shaw et al.,  
98 2000). Furthermore, as in mammals, dopamine and octopamine (the insect functional  
99 homolog to noradrenaline) promote arousal in fruit flies (Andretic et al., 2005; Kume et al.,  
100 2005; Lima and Miesenböck, 2005; Wu et al., 2008, Lebestky et al., 2009; Crocker et al., 2010;  
101 Riemensperger et al., 2011), and GABA promotes sleep (Agosto et al., 2008; Gmeiner et al.,  
102 2013). Dopamine is most probably the strongest wake-promoting neuromodulator in fruit flies  
103 (reviewed by Birman, 2005). Hyperactive and sleepless *fumin* mutants carry a mutation in the  
104 dopamine transporter, which transports released dopamine back into the dopaminergic  
105 neurons (Kume et al., 2005). The *fumin* mutation results in a hypomorphic transporter, which  
106 leads to permanently high dopamine levels that continue to activate dopamine receptors on  
107 the postsynaptic neurons. Similar wake-promoting and sleep-reducing effects are observed  
108 when dopaminergic neurons are excited (Lima and Miesenböck, 2005; Wu et al., 2008, Shang  
109 et al., 2011; Liu et al., 2012; Ueno et al., 2012). Conversely, mutants deficient for tyrosine  
110 hydroxylase (TH), the rate-limiting enzyme for dopamine synthesis in the nervous system, have  
111 reduced dopamine levels and increased sleep throughout the day (Riemensperger et al., 2011).

112 In *D. melanogaster* the mushroom bodies (Joiner et al., 2006; Pitman et al., 2006; Yuan  
113 et al., 2006), the pars intercerebralis (Foltényi et al., 2007; Crocker et al., 2010) and lateralis  
114 (Chen et al., 2016), the fan-shaped body of the central complex (Liu et al., 2012; Ueno et al.,  
115 2012; Pimentel et al., 2016; Donlea et al., 2018) have been identified as brain regions that  
116 regulate sleep. In addition, the Pigment-Dispersing Factor (PDF)-expressing large and small  
117 ventral Lateral Neurons (l-LN<sub>v</sub>s and s-LN<sub>v</sub>s), which belong to the circadian clock neurons have

118 been identified as wake-promoting neurons within the flies circadian clock neuron network  
119 (Parisky et al., 2008; Sheeba et al., 2008a; Shang et al., 2008; Lebestky et al., 2009; Guo et al.,  
120 2016; Guo et al., 2018; Potdar and Sheeba, 2018; Liang et al., 2019).

121 The l-LN<sub>v</sub>s respond to both dopamine and octopamine through increases in cAMP, but  
122 the responses to dopamine are clearly stronger (Shang et al., 2011). Furthermore, the l-LN<sub>v</sub>s  
123 are directly light sensitive and promote arousal and activity in response to light, especially in  
124 the morning (Shang et al., 2008; Sheeba et al., 2008b; Fogle et al., 2011). Despite the strong  
125 responses of the l-LN<sub>v</sub>s to dopamine and their proposed role in controlling arousal, it is not  
126 known how dopamine-signaling to the l-LN<sub>v</sub>s increases wakefulness and inhibits sleep.  
127 Receptivity to dopamine in the s-LN<sub>v</sub>s has not been previously addressed. Here, we down-  
128 regulated the activating D1-like dopamine receptors Dop1R1 and Dop1R2 in the wake  
129 promoting l- and s-LN<sub>v</sub>s and examined the consequences on intracellular cAMP levels, resting  
130 membrane potential, and electrical firing rate in the electrophysiologically accessible l-LN<sub>v</sub>s.  
131 Moreover, we analyzed the behavioral consequences of Dop1R1/ Dop1R2 knock-down in the l-  
132 and s-LN<sub>v</sub>s on sleep and activity rhythms. As expected, we find that the knockdown of Dop1R1  
133 reduces cAMP and electrophysiological responses to dopamine in the l-LN<sub>v</sub>s, confirming that  
134 dopamine signals via Dop1R1 receptors. Unexpectedly, we find that the down-regulation of  
135 the excitatory Dop1R1 receptor slightly decreases daytime sleep, suggesting that dopamine  
136 signaling via Dop1R1 to the LN<sub>v</sub>s usually promotes daytime sleep rather than wakefulness.  
137 Finally, we find that dopamine also likely signals to the s-LN<sub>v</sub>s via Dop1R2 receptors, and that  
138 the down-regulation of these receptors decreases night-sleep. Collectively, these results cast  
139 doubt on the currently held view of LN<sub>v</sub>s as dedicated wake-promoting neurons, and suggest a  
140 more complex regulation of sleep by these important clock neurons.

141

142

## 143 **Material and Methods**

### 144 ***Fly stocks***

145 Flies were raised on *Drosophila* food (0.8 % agar, 2.2 % sugar-beet syrup, 8.0 % malt  
146 extract, 1.8 % yeast, 1.0 % soy flour, 8.0 % corn flour and 0.3 % hydroxybenzoic acid) at 25 °C  
147 under a 12 h:12 h light:dark (LD) cycle and transferred to 20 °C at an age of ~3 days.

148 To visualize TH-positive (dopaminergic) and the PDF-positive neurons we used *TH-Gal4*  
149 (Friggi-Grelin et al., 2002) to drive *UAS-10xmyrGFP* in dopaminergic neurons and stained with  
150 anti-GFP and anti-PDF. For visualizing presynapses of dopaminergic neurons and postsynapses  
151 of PDF neurons, we expressed the vesicle marker synaptotagmin::GFP (*UAS-sytl/II::GFP*;  
152 Bloomington) under control of *TH-Gal4* in dopaminergic neurons and a GFP labeled  
153 postsynaptic protein - the Down syndrome cell-adhesion molecule (*UAS-dscam::GFP*; Wang et  
154 al. 2004) - under control of *Pdf-Gal4* in PDF neurons. To visualize the spatial vicinity of  
155 dopaminergic and PDF fibers we used Split-GFP imaging (= GFP Reconstitution Across Synaptic  
156 Partners (GRASP); Feinberg et al., 2008): *yw;pdf-LexA/LexAop-GFP11;TH-Gal4/UAS-GFP1-10*  
157 flies were used to express the GFP11 fragment in the PDF-expressing LN<sub>s</sub> and the GFP1-10  
158 fragment in dopaminergic neurons, respectively. *yw;pdf-LexA/LexAop-GFP11;TM6B.Tb/UAS-*  
159 *GFP1-10* flies were used as controls.

160 In order to down-regulate the different dopamine receptors in all clock neurons or  
161 only in the PDF neurons (s-LN<sub>s</sub> and l-LN<sub>s</sub>), we used *Clk856-Gal4* (Gummadova et al., 2009) or  
162 *Pdf-Gal4* (Park et al., 2000), respectively to either express *UAS-Dop1R1<sub>RNAi</sub>* (no. 31765,  
163 Bloomington stock center), *UAS-Dop1R2<sub>RNAi</sub>* (no. 26018, Bloomington stock center) or *UAS-*  
164 *D2R<sub>RNAi</sub>* (no. 26001, Bloomington stock center) alone, or to simultaneously express *UAS-*  
165 *Dop1R1<sub>RNAi</sub>* and *UAS-Dop1R2<sub>RNAi</sub>*. The flies with the relevant Gal4 and UAS constructs (crossed  
166 with *UAS-dicer2* flies) were taken as controls. In addition, we used an inducible Gal4 version,  
167 termed GeneSwitch (GS) (Osterwalder et al., 2001), under the control of the *Pdf* promotor  
168 (Depetris-Chauvin et al., 2011) to down-regulate Dop1R1 or Dop1R2 receptors in the PDF

169 neurons only during adulthood of the flies. GS is a fusion between the Gal4 binding, the NF $\kappa$ B  
170 activation and the human progesterone receptor ligand-binding domains, which is expressed  
171 in the pattern dictated by the desired promoter but remains transcriptionally silent in the  
172 absence of RU486 (RU), an analog of progesterone. RU was mixed to the food of the adult flies  
173 in the Trikinetics monitors (see below). In all experiments *UAS-Dicer2* (no. 60012, Vienna  
174 *Drosophila* RNAi Center, Wien, Austria) was expressed additionally to enhance the effect. For  
175 simplicity we will call the experimental flies Clk856>Dop1Rx<sub>RNAi</sub>, Pdf>Dop1Rx<sub>RNAi</sub> or PDF-  
176 GS>Dop1Rx<sub>RNAi</sub>, where the 'x' stands for the relevant dopamine receptor. Their sleep and  
177 activity profiles will always be depicted in red, while the relevant control flies are shown in  
178 black.

179 For imaging experiments the above described *Clk856-Gal4* or *Pdf-Gal4* line was used to  
180 express the ratiometric cAMP sensor *UAS-Epac1-camps* (Nikolaev et al., 2004), *UAS-dicer2* and  
181 the RNAi-constructs for different dopamine-receptors (see above).

182

### 183 ***Immunostaining and microscopy***

184 For immunostaining, whole-mount brains were fixed in 4 % paraformaldehyde (PFA) in  
185 phosphate buffered saline (PBS) for 2 hours at RT, followed by 4 washes in PBS containing  
186 0.3 % TritonX-100 (PBT). They were blocked in 5 % normal goat serum (NGS) in PBT.  
187 Subsequently, the specimens were incubated in the primary antibody solution overnight at  
188 4 °C. The primary antibody solution contained GFP antibody (raised in rabbit, Molecular  
189 Probes, A11122; dilution 1:1000) and PDF antibody (monoclonal mouse C7 antibody;  
190 Developmental Studies Hybridoma Bank at the University of Iowa; dilution 1:100). After rinsing  
191 in PBT, fluorescence conjugated secondary antibodies (Alexa-Fluor® Dyes, Molecular Probes,  
192 Carlsbad, CA) were applied overnight at 4 °C. The stained brains were finally embedded in  
193 Vectashield and scanned with a Confocal Microscope (Leica TCS SPE, Wetzlar, Germany).

194



195 ***Ex vivo live-cAMP imaging***

196 Flies were well entrained to a LD 12:12 cycle and imaging always took place during the light  
197 phase of the LD cycle (between ZT2 and ZT8). For imaging, flies were anesthetized on ice and  
198 brains were dissected in cold hemolymph-like saline (HL3; Stewart et al., 1994) and mounted  
199 at the bottom of a plastic petri dish in HL3. Brains were allowed to recover from dissection for  
200 at least 10 min prior to imaging. An epifluorescent imaging setup (VisiChrome High Speed  
201 Polychromator System, ZEISS Axioskop2 FS plus, Visitron Systems GmbH) with a 40x dipping  
202 objective (ZEISS 40x/1,0 DIC VIS-IR) was used for all imaging experiments. Neurons were  
203 localized using GFP-optics and were identified according to their position in the brain. Regions  
204 of interest were defined on single cell bodies in the Visiview Software (version 2.1.1, Visitron  
205 Systems GmbH). Time-lapse frames were acquired with 0.2 Hz for 12 min, exciting the CFP  
206 fluorophore of the ratiometric cAMP sensor with light of 405 nm. Emissions of CFP and YFP  
207 were detected separately by a CCD-camera (Photometrics, CoolSNAP HQ, Visitron Systems  
208 GmbH) with a beam splitter. After measuring baseline CFP and YFP levels for ~100 s,  
209 pharmacological treatments were bath applied drop-wise using a pipette. HL3 application  
210 served as negative control and 10  $\mu\text{M}$  NKH<sup>477</sup> (an activator of all adenylate cyclases) as positive  
211 control. Dopamine and SKF<sup>38393</sup> (a DopR1 agonist) were diluted in HL3 and were applied in an  
212 end concentration of 1 mM and 0.1 mM, respectively. For Tetrodotoxin (TTX)-treatments,  
213 brains were incubated in 2  $\mu\text{M}$  TTX in HL3 for 20 min prior to imaging and dopamine was  
214 diluted in 2  $\mu\text{M}$  TTX in HL3 for the application. Inverse Fluorescence Resonance Energy  
215 Transfer (iFRET) was calculated according to the following equation:  $\text{iFRET} = \text{CFP} / (\text{YFP} -$   
216  $\text{CFP} * 0.357)$  (Shafer et al., 2008). Thereby, CFP and YFP are background corrected raw  
217 fluorescence data and 0.357 was determined as the fraction of CFP spillover into the YFP  
218 channel in our imaging setup, which had to be subtracted from YFP fluorescence. Finally, iFRET  
219 traces of individual neurons were normalized to base line levels and were averaged for each

220 treatment. For quantification and statistical comparison of response amplitudes of each  
221 treatment or genotype, maximum iFRET changes were determined for individual neurons.

222

### 223 ***Ex vivo patch-clamp electrophysiology***

224 Three to nine days-old female flies were anesthetized with a brief incubation of the vial on ice,  
225 brain dissection was performed in external recording solution which consisted of (in mM): 101  
226 NaCl, 3 KCl, 1 CaCl<sub>2</sub>, 4 MgCl<sub>2</sub>, 1.25 NaH<sub>2</sub>PO<sub>4</sub>, 5 glucose, and 20.7 NaHCO<sub>3</sub>, pH 7.2, with an  
227 osmolarity of 250 mmol/kg (based on saline solution used by Cao and Nitabach, 2008). After  
228 removal of the proboscis, air sacks and head cuticle, the brain was routinely glued ventral side  
229 up to a sylgard-coated coverslip using a few microliters of tissue adhesive 3 M Vetbond. The  
230 time from anesthesia to the establishment of the recordings was approximately 20 minutes  
231 spent as following: l-LN<sub>s</sub> were visualized by red fluorescence in *Pdf-RFP* flies (which express a  
232 red fluorophore under the Pdf promoter, Ruben et al., 2012) using an Olympus BX51WI upright  
233 microscope with 60X water-immersion lens and ThorLabs LEDD1B and TK-LED (TOLKET S.R.L,  
234 Argentina) illumination systems. Once the fluorescent cells were identified, cells were  
235 visualized under IR-DIC using a DMK23UP1300 Imaging Source camera and IC Capture 2.4  
236 software. l-LN<sub>s</sub> were distinguished from s-LN<sub>s</sub> by their size and anatomical position. To allow  
237 the access of the recording electrode, the superficial glia directly adjacent to l-LN<sub>s</sub> somas was  
238 locally digested with protease XIV solution (10 mg/ml, SIGMA-ALDRICH P5147) dissolved in  
239 external recording solution. This was achieved using a large opened tip (approximately 20 μm)  
240 glass capillary (pulled from glass of the type FG-GBF150-110-7.5, Sutter Instrument, US) and  
241 gentle massage of the superficial glia with mouth suction to render the underling cell bodies  
242 accessible for the recording electrode with minimum disruption of the neuronal circuits. After  
243 this procedure, protease solution was quickly washed by perfusion of external solution.  
244 Recordings were performed using thick-walled borosilicate glass pipettes (FG-GBF150-86-7.5,  
245 Sutter Instrument, US) pulled to 7-8 MΩ using a horizontal puller P-97 (Sutter Instrument, US)

246 and fire polished to 9-12 M $\Omega$ . Recordings were made using a Multiclamp 700B amplifier  
247 controlled by pClamp 10.4 software via an Axon Digidata 1515 analog-to-digital converter  
248 (Molecular Devices, US). Recording pipettes were filled with internal solution containing (in  
249 mM): 102 potassium gluconate, 17 NaCl, 0.085 CaCl<sub>2</sub>, 0.94 EGTA and 8.5 HEPES, pH 7.2 with an  
250 osmolarity of 235 mmol/kg (based on the solution employed by Cao and Nitabach 2008).  
251 Gigaohm seals were accomplished using minimal suction followed by break-in into whole-cell  
252 configuration using gentle suction in voltage-clamp mode with a holding voltage of -60 mV.  
253 Gain of the amplifier was set to 1 during recordings and a 10 kHz lowpass filter was applied  
254 throughout. Spontaneous firing was recorded in current clamp (I=0) mode. Analysis of traces  
255 was carried out using Clampfit 10.4 software. For action potential firing rate calculation the  
256 event detection tool of Clampfit 10.4 was used. Perfusion of external saline in the recording  
257 chamber was achieved using a peristaltic pump (Ismatec ISM831). After 3 min of recording  
258 basal conditions, 10 ml of Dopamine (1 mM) prepared in external saline were perfused, this  
259 lasted approximately 3 minutes. Dopamine was then washed out with external saline  
260 perfusion during 10 minutes. For basal condition, the number of action potentials on the last  
261 minute before Dopamine application was counted. For Dopamine condition, the number of  
262 action potentials was counted on the last minute of Dopamine perfusion. For wash out  
263 condition, the number of action potentials was counted on the last minute of the recording. In  
264 all cases, the firing rate in Hz was calculated by dividing the number of action potentials over  
265 60 seconds. The membrane potential was assessed during the same periods for each  
266 condition. All recordings were performed during the time-range of ZT6 to ZT9.

267

### 268 ***Recording of sleep and activity***

269 Locomotor activity of male 3-7 days old flies was recorded as described previously (Hermann-  
270 Luibl et al., 2014) using *Drosophila* Activity Monitors by TriKinetics. The fly tubes were fixed by  
271 a Plexiglas frame in such a way that the infrared beam crossed each fly tube at a distance of

272 ~3 mm from the food. The food consisted of 4 % sugar in agar. For the gene-switch  
273 experiments, RU486 (mifepristone, Sigma) was dissolved in 80 % ethanol and mixed with the  
274 food to a final concentration of 200 mg/ml. In the controls the same amount of ethanol  
275 (vehicle) was added to the food. Flies were monitored for 9 days in 12 h:12 h light-dark cycles  
276 12:12 (LD 12:12) with a light intensity of 100 lux at 20 °C and then released into constant  
277 darkness (DD). Recording days 3-7 in LD were used for sleep and activity analysis.

278 Sleep analysis was performed with a custom-made Excel Macro (provided by T. Yoshii;  
279 Gmeiner et al., 2013; Hermann-Luibl et al., 2014). Sleep was defined as the occurrence of 5  
280 consecutive recording minutes without interruption of the infrared-beam within the TriKinetics  
281 monitor. For average daily sleep profiles, sleep was calculated in 1-hour-bins and averaged  
282 over the 5 selected days for each single fly and genotype. Furthermore, the total amount of  
283 sleep was averaged over the 5 days, as well as the amount of sleep during the light phase and  
284 the dark phase and the average sleep bout duration. Every experiment was repeated at least  
285 twice and at a minimum 30 flies of each genotype were used for the analysis.

286 The same 5 days of recordings used for sleep evaluation were also analyzed for fly  
287 activity. Daily average activity profiles were calculated for each fly as described in Schlichting  
288 and Helfrich-Förster (2015). From these, the total activity (number of infrared-beam crosses)  
289 of every fly during the entire day, the dark-phase and the light-phase were calculated and  
290 plotted for each genotype. An activity index (the average of beam crosses per active minute)  
291 was also calculated but not shown, since it correlated with the total activity. The free-running  
292 period of each fly was determined from the recordings in DD to judge whether down-  
293 regulating the dopamine receptors changed the speed of the circadian clock.

294

## 295 **Statistics**

296 Statistical analyses of sleep and activity data were performed using the R environment (v3.5.3).  
297 Data were tested for normal distribution with a Shapiro-Wilk normality test ( $p > 0.05$ ). The three

298 data groups “whole day”, “day” and “night” were tested separately. If any group wasn’t  
299 normally distributed the whole dataset was handled as not normally distributed. In this case  
300 the Mann–Whitney *U* test was used. A T-test was used for normally distributed data in case of  
301 variance homogeneity (Levene’s test,  $p>0.05$ ). Period length was tested for statistically  
302 significant influences of dopamine receptor RNAi and RU treatment by a two-way ANOVA  
303 followed by a post-hoc test with Bonferroni correction. Statistical tests on live imaging data  
304 were also done with the R environment. We compared the Epac1-camps inverse FRET ratio  
305 between vehicle and test compounds and used the Wilcoxon signed rank test with Bonferroni  
306 correction for multiple comparisons of maximum changes. Exceptions are stated in the figure  
307 legends. Electrophysiological data (membrane potential and firing rate) was analyzed with  
308 Kruskal-Wallis non-parametric test, the alpha parameter was 0.05 and the post hoc test used  
309 the Fisher's least significant difference criterion. Bonferroni correction was applied as the  
310 adjustment method.

## 311 **Results**

### 312 **Dopaminergic neurons are presynaptic to the ventrolateral clock neurons (l-LN<sub>v,s</sub> and s-LN<sub>v,s</sub>)** 313 **that arborize in the accessory medulla**

314 Both, the s-LN<sub>v,s</sub> and l-LN<sub>v,s</sub> express the neuropeptide PDF and send dendrites into the  
315 accessory medulla (AME) - the insect clock center (Helfrich-Förster, 1995; Helfrich-Förster et  
316 al., 2007). These neurons are thought to be wake-promoting: their activity coincides with the  
317 morning peak of wakefulness (Liang et al., 2019), and their optogenetic excitation, along with  
318 other lateral neuron types, reduces sleep (Guo et al., 2018). The s-LN<sub>v,s</sub> project into the  
319 dorsolateral brain and are there connected to other clock neurons and several neurons  
320 downstream of the clock that control activity and sleep (reviewed in King and Sehgal, 2020).  
321 The l-LN<sub>v,s</sub> are conspicuous clock neurons with wide arborizations in the ipsilateral and  
322 contralateral optic lobe and connections between the brain hemispheres (Helfrich-Förster et  
323 al., 2007). In the AME, their neurites overlap with those of dopaminergic neurons (Hamasaka  
324 and Nässel, 2006; Shang et al., 2011). Microarray studies show that they express genes  
325 encoding the excitatory dopamine receptors Dop1R1, Dop1R2, and DopEcR) and the inhibitory  
326 dopamine D2R, in addition to the excitatory octopamine receptors OAMB and OA2 (Kula-  
327 Eversole et al., 2010; Shang et al., 2011). The AME of *Drosophila* can be subdivided into two  
328 parts: a central part and a ventral elongation (Fig. 1). Whereas the central part is innervated by  
329 several clock neurons including the PDF-positive small ventrolateral neurons (s-LN<sub>v,s</sub>), the  
330 ventral elongation only receives fibers from the l-LN<sub>v,s</sub> (Helfrich-Förster et al., 2007; Schubert et  
331 al., 2018). Previous studies already suggested that the PDF-fibers in the ventral elongation of  
332 the AME are predominantly postsynaptic (of dendritic nature) (Helfrich-Förster et al., 2007)  
333 and in close vicinity to dopaminergic fibers (Shang et al., 2011; Fig. 1a), but whether the  
334 dopaminergic fibers were of presynaptic nature was unclear. By expressing the vesicle marker  
335 *Synaptotagmin (Sytl/II)::GFP* in the *TH-Gal4*-positive (dopaminergic) neurons and the  
336 postsynaptic marker *Dscam::GFP* in the *Pdf-Gal4*-positive neurons we show here that this is

337 indeed the case (Fig. 1). Prominent Syt1/II::GFP staining was present in *TH-Gal4*-positive fibers  
338 that are aligned along the ventral elongation (Fig. 1c) and Dscam::GFP was strongly localized in  
339 the PDF fibers of the entire ventral elongation of the AME (Fig. 1d). Using GRASP imaging, we  
340 confirmed previous results that PDF- and *TH-Gal4*-positive fibers have contact in the central  
341 part of the AME and its ventral elongation (Shang et al., 2011): reconstituted GFP signals were  
342 present in both parts of the AME (Fig. 1b), whereas no reconstituted GFP signals were  
343 detected in control flies. In summary, we show here that the dopaminergic neurons are  
344 presynaptic to the l-LN<sub>v</sub>s and s-LN<sub>v</sub>s.

345

#### 346 **Dopamine signals to different clock neurons**

347 It was shown previously that dopamine application to isolated brains elevates cAMP levels in  
348 the l-LN<sub>v</sub>s (Shang et al., 2011). We confirmed this result and extended it to the other clock  
349 neurons that have arborizations in the central part of the AME, i.e. the s-LN<sub>v</sub>s, the dorsolateral  
350 neurons (LN<sub>d</sub>s) and the anterior dorsal neurons 1 (DN<sub>1a</sub>s) (Helfrich-Förster et al., 2007;  
351 Schubert et al., 2018). The l-LN<sub>v</sub>s showed the strongest responses to dopamine, which were  
352 even higher after blocking synaptic transmission by TTX, suggesting that inhibitory signals from  
353 other interneurons usually reduce the cAMP response to dopamine (Fig. 2a). Significant  
354 responses to dopamine that persisted under TTX were also present in the LN<sub>d</sub>s (Fig. 2b) and  
355 the DN<sub>1</sub>s (Fig. 2c). The s-LN<sub>v</sub>s also exhibited significantly increased cAMP levels after dopamine  
356 application; but these cells are hard to image, because they are very small and often located  
357 underneath the l-LN<sub>v</sub>s, so that their responses cannot be unequivocally separated from those  
358 of the l-LN<sub>v</sub>s. Therefore, we could only image a few of them without application of TTX (Fig. 3).

359         Next, we tested whether these cAMP responses were mediated by Dop1R1 or Dop1R2  
360 receptors. Knockdown of Dop1R1 by RNAi in all clock neurons, reduced cAMP responses in the  
361 l-LN<sub>v</sub>s (Fig. 4a, d), the DN<sub>1</sub>s (Fig. 4c, f) and the LN<sub>d</sub>s (Fig. 4b, e), whereas the down-regulation of  
362 Dop1R2 appeared to reduce cAMP levels in all neuron clusters slightly but not significantly (Fig.

363 4a-c). Notably, the cAMP signals in the LN<sub>d</sub>s were quite variable when Dop1R1 or Dop1R2 were  
364 down-regulated; some neurons still responded to dopamine, while others did not (Fig. 4e). The  
365 same applies for the DN<sub>1</sub>s knockdown of Dop1R1; half of the cells responded, the other half  
366 did not (Fig. 4f). However, with knockdown of Dop1R2, only two of the measured 22 DN<sub>1</sub> cells  
367 did not respond to dopamine (Fig. 4f). Altogether, this suggests that some LN<sub>d</sub>s and DN<sub>1</sub>s  
368 express Dop1R1 and others Dop1R2. Consistent with this hypothesis the simultaneous down-  
369 regulation of Dop1R1 and Dop1R2 abolished the responses to dopamine in all evaluated  
370 neurons (Fig. 4). Down-regulation of the inhibitory dopamine receptor D2R, slightly increased  
371 the responses to dopamine in the I-LN<sub>v</sub>s (Fig. 4a, d) and the LN<sub>d</sub>s (Fig. 4b, e); but in contrast to  
372 a previous study (Shang et al., 2011) this increase was not significant. To make sure that the  
373 neurons were able to increase their cAMP levels in our setup, we measured cAMP levels in  
374 responses to NKH<sup>477</sup>, an adenylyl cyclase activator, and found that they all responded (Fig. 5).

375 In summary, our results show that the responses to dopamine are predominantly  
376 mediated by Dop1R1 receptors in the I-LN<sub>v</sub>s and DN<sub>1</sub>s and by Dop1R1 and Dop1R2 receptors in  
377 the LN<sub>d</sub>s. As described above, we could not identify the relevant Dop1R1 receptors of the s-  
378 LN<sub>v</sub>s, because these cells were hidden by the I-LN<sub>v</sub>s or just located too close to them, which  
379 prevented a successful imaging in all the preparations with down-regulated Dop1R receptors.

380

### 381 **Effects of Dop1R1 and Dop1R2 down-regulation in the clock neurons on sleep**

382 To study the consequences of reduced dopamine signaling in the LN<sub>v</sub> clock neurons on sleep,  
383 we first down-regulated the activating Dop1R1 and Dop1R2 receptors in all clock neurons  
384 (using *Clk856-Gal4*). We did not see any significant changes in sleep pattern (Fig. 6a), total  
385 sleep, or sleep during day and night, nor on sleep bout duration (Fig. 6b) with down-regulation  
386 of each of the receptors alone or down-regulation of both receptors simultaneously. However,  
387 the activity level during the day was significantly reduced by down-regulation of each of the  
388 two dopamine receptors alone or in combination (Fig. 6c, d). Furthermore, in the case of



389 Dop1R2 down-regulation, activity during the night was significantly increased (Fig. 6d). The  
390 free-running period in constant darkness did not change when dopamine receptors were  
391 knocked down, only the power of the rhythm was decreased slightly by knockdown of both  
392 dopamine receptors simultaneously (Table 1).

393         Since among all clock neurons the s-LN<sub>s</sub> and l-LN<sub>s</sub> have been the ones with the most  
394 prominent role in sleep and arousal regulation, we decided to repeat Dop1R1 and Dop1R2  
395 receptor down-regulation more specifically using the *Pdf-Gal4* driver. The l- and s-LN<sub>s</sub>  
396 collectively produce the first daily peak of wakefulness (Renn et al., 1999; Grima et al., 2004;  
397 Stoleru et al., 2004; Rieger et al., 2006; Potdar and Sheeba, 2018; Liang et al., 2019) and the l-  
398 LN<sub>s</sub> mediate light driven arousal (Parisky et al., 2008; Shang et al., 2008; Sheeba et al., 2008a;  
399 Lebestky et al., 2009). We repeated Dop1R1 and Dop1R2 receptor down-regulation in these  
400 neurons using the *Pdf-Gal4* driver. Once again, the general sleep pattern was not affected by  
401 the down-regulation (Fig. 7a), but total sleep and mean sleep bout duration were significantly  
402 reduced after all manipulations (down-regulation of Dop1R1 or Dop1R2 and simultaneous  
403 down-regulation of both receptors) (Fig. 7b). Closer inspection revealed that Dop1R1 down-  
404 regulation reduced sleep significantly during the day, whereas Dop1R2 down-regulation  
405 reduced sleep significantly both during the day and night, as did the down-regulation of both  
406 receptors simultaneously. The effects of dopamine receptor down-regulation on activity levels  
407 were mixed. We did not observe any effects on daytime activity, but nighttime activity was  
408 slightly but significantly increased by Dop1R2 receptor knockdown and knockdown of both  
409 receptors (Fig. 7c, d). We did not observe any effects on the period or the power of the free-  
410 running rhythms in DD (Table 1). In summary, these results suggest that reduction in dopamine  
411 signaling in the LN<sub>s</sub> has no effect on the speed of the clock. However, dopamine signaling  
412 unexpectedly appears to increase sleep via Dop1R1 receptors during the day and via Dop1R2  
413 receptors during the day and the night. These results should be treated with caution because

414 they were achieved by constitutive knockdown of dopamine receptors, which may cause  
415 developmental effects.

416 To assess possible developmental effects of Dop1R1 or Dop2R1 knockdown on the PDF  
417 neurons, we repeated our LN<sub>v</sub> knockdown experiments using GeneSwitch (GS) (Depetris-  
418 Chauvin et al., 2011). Feeding flies the progesterone derivative RU (dissolved in ethanol) only  
419 during adulthood restricted the expression of RNAi constructs to the adult stage. We used two  
420 types of controls. (1) *Pdf-GS>uas-Dop1Rx* fed with ethanol alone served as controls for *Pdf-*  
421 *GS>uas-Dop1Rx* flies fed with RU (Fig. 9). (2) *Pdf-GS* and *uas-Dop1Rx* flies, in which the  
422 dopamine receptors were not down-regulated and which were fed either with ethanol alone  
423 or with RU, served as controls for the effect of RU (Fig. 8). In the latter, we did not find any  
424 systematic difference in activity and sleep between the RU and ethanol-fed flies (Fig. 8). Only  
425 in *Pdf-GS* controls did we find that nocturnal activity was significantly decreased during the last  
426 few hours of the night after feeding RU. In the experimental animals (with dopamine knock-  
427 down), the differences between controls and permanent Dop1R2-knockdown during the day  
428 disappeared when this receptor knocked-down conditionally, suggesting that these were  
429 caused by developmental effects. Nevertheless, the significant reduction in daytime sleep after  
430 Dop1R1 knockdown and the reduction of night sleep after Dop1R2 knockdown persisted (Fig.  
431 9a, b). Furthermore, the conditional down-regulation of dopamine receptors increased activity  
432 during the day and the night (Fig. 9c, d). Since the effects of conditional dopamine receptor  
433 down-regulation were in the same direction as the constitutive receptor down-regulation and  
434 in the opposite direction of RU feeding (Fig. 8) in *Pdf-GS* controls, we conclude that these are  
435 specific and indeed caused by down-regulation of the dopamine receptors in the PDF neurons.

436 We observed a highly significant period-lengthening effect of RU application in *Pdf-GS*  
437 controls and all the crosses with the *Pdf-GS* strain (Table 1), which has been reported in the  
438 past (Depetris-Chauvin et al., 2011; Frenkel et al., 2017). Therefore, we conclude that

439 conditional dopamine receptor down-regulation itself does not affect the free-running period,  
440 which is in line with the results obtained via permanent dopamine receptor knockdown.

441

442 **Dopamine depolarizes the I-LN<sub>v</sub>s via Dop1R1, but does not increase their firing rate**

443 When observed electrophysiologically using whole-cell patch clamp, the I-LN<sub>v</sub>s fire  
444 spontaneous action potentials in bursting or tonic modes (e.g. Cao and Nitabach, 2008; Sheeba  
445 et al., 2008b; Depetris-Chauvin et al., 2011; Fogle et al., 2011; Muraro and Ceriani, 2015). As  
446 reported previously, when whole-cell patch clamp recordings are performed in the morning  
447 and established rapidly after brain dissection (Muraro and Ceriani, 2015), all I-LN<sub>v</sub>s fire action  
448 potentials in the bursting mode (Fig. 10). To further explore the role of dopamine on the  
449 physiology of I-LN<sub>v</sub>s, we bath-applied dopamine across control I-LN<sub>v</sub>s (Fig. 10a), and in I-LN<sub>v</sub>s in  
450 which Dop1R1 (Fig. 10b) or Dop1R2 (Fig. 10c) had been down-regulated using RNAi constructs  
451 driven by the *Pdf-Gal4*. Control and Dop1R2<sub>RNAi</sub> I-LN<sub>v</sub>s displayed robust depolarizations upon 1  
452 mM dopamine application (Fig. 10a, c, and d). In contrast, we observed significantly reduced  
453 dopamine induced depolarization when Dop1R1 expression was down-regulated (Fig. 10b and  
454 d). This result is consistent with cAMP imaging experiments (Fig. 4) and supports the  
455 hypothesis that dopamine responses in I-LN<sub>v</sub>s are mainly mediated by the Dop1R1 receptor.  
456 Although we observed a small trend toward a decrease in firing rate upon dopamine  
457 application, this was not statistically significant (Fig. 11). These results suggest that, in I-LN<sub>v</sub>s,  
458 dopamine plays a modulatory role as it depolarizes the membrane without significantly  
459 changing the firing rate. Thus, dopamine might make the I-LN<sub>v</sub>s more sensitive to excitatory  
460 inputs.

## 461 **Discussion**

### 462 **All tested clock neurons respond to dopamine**

463 Here we show that dopamine acts broadly on the neurons of the *Drosophila* clock network  
464 that have neurites in the AME, a neuropil that is invaded by presynaptic terminals of  
465 dopaminergic neurons. All of these clock neurons responded to dopamine with increases in  
466 cAMP. The responses of the l-LN<sub>v</sub>s and DN<sub>1</sub>s were almost completely blocked by down-  
467 regulation of Dop1R1 receptors but not significantly by down-regulation of Dop1R2 receptors,  
468 whereas the responses of some LN<sub>d</sub>s were blocked by down-regulation of Dop1R1 and others  
469 by down-regulation of Dop1R2 receptors. Dopamine responses of all LN<sub>d</sub> cells were eliminated  
470 by simultaneous down-regulation of both receptors. This indicates that the LN<sub>d</sub>s employ  
471 different activating dopamine receptors.

472 Since the electrophysiological and cAMP responses of the l-LN<sub>v</sub>s were not blocked by  
473 down-regulating Dop1R2 receptors we conclude that these neurons employ only Dop1R1  
474 receptors. Unfortunately, we could not assess the nature of the Dop1R receptors in the s-LN<sub>v</sub>s,  
475 but we hypothesize that these employ Dop1R2 receptors for the following reason: the down-  
476 regulation of Dop1R2 receptors in the s-LN<sub>v</sub>s and l-LN<sub>v</sub>s significantly reduces the flies' night-  
477 time sleep. Since the l-LN<sub>v</sub>s appear not to utilize Dop1R2 receptors this effect is most likely  
478 mediated by the s-LN<sub>v</sub>s.

479

### 480 **Dopamine signaling on the s-LN<sub>v</sub>s appears to promote sleep**

481 Multiple lines of evidence are consistent with a wake promoting role for the s-LN<sub>v</sub>s (e.g. Liang  
482 et al., 2019). We were therefore surprised to find that the knockdown of the excitatory  
483 dopamine receptor Dop1R2 produce decreases in nighttime sleep. We note here that the s-  
484 LN<sub>v</sub>s have been shown to promote sleep during the entire day via PDF-signaling to the  
485 AllatostatinA (AstA) positive 'PLP' neurons (Chen et al., 2016), which were recently shown to  
486 be identical with the Lateral Posterior clock neurons (LPNs) (Ni et al., 2019). Optogenetic

487 excitation of the LPNs promotes sleep (Guo et al. 2018) and glutamatergic and AstA neurites  
488 provide excitatory inputs on to the sleep promoting dorsal fan-shaped body (Donlea et al.,  
489 2011; Liu et al., 2012; 2016; Ueno et al., 2012; Pimentel et al., 2016; Ni et al., 2019). Thus, our  
490 results, along with previous work, suggest that: 1) the role of the s-LN<sub>v</sub>s in the control of sleep  
491 is more complex than previously acknowledged, 2) dopamine likely increases cAMP levels in  
492 the s-LN<sub>v</sub>s via Dop1R2, 3) the s-LN<sub>v</sub>s excite the sleep promoting LPNs, which subsequently  
493 activate the dorsal fan-shaped body neurons leading to sleep. Thus, down-regulation of  
494 Dop1R2 receptors in the s-LN<sub>v</sub>s would therefore be predicted to reduce sleep, which fits to our  
495 observations and is consistent with the literature. However, we also must acknowledge the  
496 possibility that the s-LN<sub>v</sub>s might promote both sleep and wakefulness at different times.  
497 Recent work on the DN1<sub>p</sub> class of clock neurons showed that the temporal codes of firing in  
498 these cells shape sleep (Tabuchi et al. 2018), suggesting that some clock neurons can switch  
499 between sleep and wake promoting modes through changes in their patterns of firing. The  
500 same may prove true of the s-LN<sub>v</sub>s.

501

#### 502 **Dopamine signaling on the l-LN<sub>v</sub>s is not wake-promoting**

503 The l-LN<sub>v</sub>s were reported to be strongly wake-promoting (Sheeba et al., 2008a; Chung et al.,  
504 2009; Shang et al., 2011), but it was not clear if dopamine-signaling was responsible this effect.  
505 Here, we could not detect wake-promoting effects of dopamine signaling on the PDF neurons.  
506 In contrast, down-regulation of the excitatory Dop1R1 and Dop1R2 receptors in these neurons  
507 (along with the s-LN<sub>v</sub>s) slightly increased wakefulness. Night-sleep decreased after knockdown  
508 of Dop1R2 receptors, while day-sleep decreased after knockdown of Dop1R1 receptors. Our  
509 physiological observations make it clear that and Dop1R1 receptors are expressed by the l-  
510 LN<sub>v</sub>s. This evidently speaks against a wake-promoting role of dopamine signaling to l-LN<sub>v</sub>s.

511 The present study supports the findings of Ueno et al. (2012) who found that the  
512 ablation of the l-LN<sub>v</sub>s did not eliminate the strong arousal effects of dopamine, thereby

513 suggesting that dopamine does not drive the wake-promoting role of the I-LN<sub>v</sub>s. In fact, our  
514 results suggest a moderate sleep-promoting effect of dopamine signaling on the I-LN<sub>v</sub>s, despite  
515 of the fact that dopamine depolarizes the I-LN<sub>v</sub>s, potentially making them more excitable.  
516 Glutamate, GABA, and histamine inhibit the I-LN<sub>v</sub>s (Cao and Nitabach, 2008; Schlichting et al.,  
517 2016). While GABAergic inputs to I-LN<sub>v</sub>s have a clear role in the promotion of sleep (Agosto et  
518 al., 2008; Parisky et al., 2008; Chung et al., 2009; Gmeiner et al., 2013), such a role has not yet  
519 been demonstrated for histamine or glutamate. Other putative silencing neuromodulators of  
520 the I-LN<sub>v</sub>s are glycine (Frenkel et al., 2017) and serotonin (Yuan et al., 2005, 2006), but how  
521 these different signals interact to regulate the I-LN<sub>v</sub>s' command over wakefulness is still an  
522 open question.

523 Our study does not call into question the wake-promoting role of the I-LN<sub>v</sub>s. The  
524 ablation of the I-LN<sub>v</sub>s increases sleep, which demonstrates that their wake-promoting influence  
525 exceeds their sleep-promoting one (Chung et al., 2009). Furthermore, the I-LN<sub>v</sub>s are electrically  
526 the most active during the day when the flies are awake (Sheeba et al., 2008b; Shang et al.,  
527 2011) and the electrical hyperexcitation of the I-LN<sub>v</sub>s increases activity at night and disrupts  
528 nocturnal sleep (Sheeba et al., 2008a). Thus, the I-LN<sub>v</sub>s are firing during the day, thereby  
529 promoting daytime wakefulness, and their firing is decreased at night when flies maintain their  
530 deepest sleep. The wake promoting neuromodulators octopamine and acetylcholine act on I-  
531 LN<sub>v</sub>s (Kula-Eversole et al., 2010; Muraro and Ceriani, 2015). But the result described above,  
532 lead to the surprising conclusion that dopamine does not act wake-promoting neuromodulator  
533 of the I-LN<sub>v</sub>s.

534 In any case, the sleep-promoting role of dopamine via the I-LN<sub>v</sub>s is moderate when  
535 compared to the sleep-promoting effects of the fan-shaped body neurons that lack  
536 dopaminergic input (Liu et al., 2012; Ueno et al., 2012). Thus, dopamine signaling via the fan-  
537 shaped body has a stronger impact on sleep than dopamine signaling via the I-LN<sub>v</sub>s or the s-  
538 LN<sub>v</sub>s. The precise role played by dopaminergic inputs to I-LN<sub>v</sub>s and their modulatory effect on

539 the integration of the multiple excitatory and inhibitory afferences received by these  
540 important arousal neurons awaits further research.

541

#### 542 **Dopamine has different effects on the fan-shaped body neurons and the PDF neurons**

543 Dop1R1 and Dop1R2 receptors have already been implicated in the control of sleep in previous  
544 studies. Lebestky et al. (2009) showed that the rescue of Dop1R1 receptors in the l-LN<sub>v</sub>s of  
545 Dop1R1 mutants can partially rescue the flies' normal sleep pattern, which fits our observation  
546 that the l-LN<sub>v</sub>s utilize Dop1R1 receptors. Liu et al. (2012) and Ueno et al. (2012) showed that  
547 dopaminergic neurons signal via Dop1R1 receptors on neurons in the fan-shaped body  
548 whereas Pimentel et al. (2016) demonstrated a role of Dop1R2 receptors in the fan-shaped  
549 body. Here we suggest that dopamine signals via Dop1R2 receptors on the s-LN<sub>v</sub>s. Although  
550 the PDF neurons and the fan-shaped body neurons respond to dopamine via the same  
551 activating receptors and in both cases via an increase in cAMP levels, the electrical responses  
552 of the neurons to dopamine appear to be different.

553 In the fan-shaped body neurons, the increase of cAMP leads to an upregulation of the  
554 voltage-independent leak current K<sup>+</sup> channel "Sandman" and its translocation to the plasma  
555 membrane (Pimentel et al., 2016). Consequently, the fan-shaped body neurons switch to long-  
556 lasting hyperpolarization (OFF state), which keeps the fruit flies awake. The Rho-GTPase-  
557 activating protein Crossveinless-c locks the fan-shaped body neurons in the OFF state (Donlea  
558 et al., 2014) until unknown mechanisms flip the neurons back to the ON state. Thus, Dop1R1/2  
559 receptors silence neurons in the fan-shaped body via the increase of cAMP levels (Liu et al.,  
560 2012; Ueno et al., 2012; Pimentel et al., 2016).

561 Our results indicate a very different effect of Dop1R1 receptor signaling in the l-LN<sub>v</sub>s.  
562 The neurons depolarized in response to dopamine and this effect was blocked after knock-  
563 down of Dop1R1 receptors. Thus, dopamine excites the l-LN<sub>v</sub>s as predicted, but does not  
564 increase their firing rate. The main effect of dopamine perfusion in our *ex-vivo* preparation was

565 a robust and reversible depolarization of the membrane, which should make I-LN<sub>v</sub>s more  
566 sensitive to excitatory inputs. Thus, the effect of dopamine on the I-LN<sub>v</sub>s may be context-  
567 dependent. Lebestky et al. (2009) aroused the flies by repetitive air puffs and found that  
568 dopamine reduced the flies' hyperactivity in response to this excitation, while it increased  
569 spontaneous nocturnal activity. Both effects were mediated via Dop1R1 receptors. Although  
570 Lebestky et al. (2009) traced the dopamine effects on startle-induced hyperactivity to the  
571 central complex, we cannot exclude that similar mechanisms work in the I-LN<sub>v</sub>s. Therefore, it  
572 will be most interesting to study the effects of Dop1R1 receptor knock-down in the I-LN<sub>v</sub>s on  
573 sleep and activity of flies in the context of stimulus-induced arousal, to test not only the role of  
574 dopaminergic inputs to I-LN<sub>v</sub>s in the context of basal sleep-wake activity, but also in the  
575 context of environmentally stimulated arousal or in the presence of challenges to the sleep  
576 homeostat, such as in the generation of a sleep rebound phenomenon after a night of sleep  
577 deprivation.

578 In summary, dopamine appears to have different modulatory effects on the fan-  
579 shaped body neurons and the PDF neurons - inhibiting the former and exciting the latter. In  
580 both cases, dopamine signaling increases sleep, though in different ways and to different  
581 degrees. Dopamine signaling to the fan-shaped body is strongly sleep promoting, while  
582 dopamine signaling to the PDF neurons is weakly sleep promoting and, in case of the I-LN<sub>v</sub>s,  
583 perhaps dependent on the arousal state of the flies.

584



## 585 References

- 586 Agosto J, Choi JC, Parisky KM, Stilwell G, Rosbash M, Griffith LC (2008) Modulation of GABA<sub>A</sub>  
587 receptor desensitization uncouples sleep onset and maintenance in *Drosophila*. *Nat Neurosci*  
588 11:354-359. <https://doi.org/10.1038/nn2046>
- 589 Andretic R, van Swinderen B, Greenspan RJ (2005) Dopaminergic modulation of arousal in  
590 *Drosophila*. *Curr Biol* 15:1165–1175. <https://doi.org/10.1016/j.cub.2005.05.025>
- 591 Birman S (2005) Arousal mechanisms: speedy flies don't sleep at night. *Curr Biol* 15(16):R511-  
592 513. <https://doi.org/10.1016/j.cub.2005.06.032>
- 593 Cao G, Nitabach, MN (2008) Circadian control of membrane excitability in *Drosophila*  
594 *melanogaster* lateral ventral clock neurons. *J Neurosci* 28:6493-6501.  
595 <https://doi.org/10.1523/JNEUROSCI.1503-08.2008>
- 596 Cavey M, Collins B, Bertet C, Blau J (2016) Circadian rhythms in neuronal activity propagate  
597 through output circuits. *Nat Neurosci* 19:587-595. <https://doi.org/10.1038/nn.4263>
- 598 Chen J, Reiher W, Hermann-Luibl C, Sellami A, Cognigni P, Kondo S, Helfrich-Förster C, Veenstra  
599 JA, Wegener C (2016) Allatostatin A signalling in *Drosophila* regulates feeding and sleep and is  
600 modulated by PDF. *PLoS Genetics* 12(9):e1006346.  
601 <https://doi.org/10.1371/journal.pgen.1006492>
- 602 Chung BY, Kilman VL, Keath JR, Pitman JL, Allada R (2009) The GABA<sub>A</sub> receptor RDL acts in  
603 peptidergic PDF neurons to promote sleep in *Drosophila*. *Curr Biol* 19(5):386-390.  
604 <https://doi.org/10.1016/j.cub.2009.01.040>
- 605 Cirelli C (2009) The genetic and molecular regulation of sleep: from fruit flies to humans. *Nat*  
606 *Rev* 10:549-560. <https://doi.org/10.1038/nrn2683>
- 607 Crocker A, Shahidullah M, Levitan IB, Sehgal A (2010) Identification of a neural circuit that  
608 underlies the effects of octopamine on sleep: wake behavior. *Neuron* 65:670-681. .  
609 <https://doi.org/10.1016/j.neuron.2010.01.032>
- 610 Depetris-Chauvin A, Berni J, Aranovich EJ, Muraro NI, Beckwith EJ, Ceriani MF (2011) Adult-  
611 specific electrical silencing of pacemaker neurons uncouples molecular clock from circadian  
612 outputs. *Curr Biol* 21, 1783–1793. <https://doi.org/10.1016/j.cub.2011.09.027>
- 613 Donlea JM, Ramanan N, Shaw PJ (2009) Use-dependent plasticity in clock neurons regulates  
614 sleep need in *Drosophila*. *Science* 324:105-108. <https://doi.org/10.1126/science.1166657>
- 615 Donlea JM, Thimgan MS, Suzuki L, Gottschalk L, Shaw PJ (2011) Inducing sleep by remote  
616 control facilitates memory consolidation in *Drosophila*. *Science* 332:1571-1576.  
617 <https://doi.org/10.1126/science.1202249>
- 618 Donlea JM, Pimentel D, Miesenböck G (2014) Neuronal machinery of sleep homeostasis in  
619 *Drosophila*. *Neuron* 81:860-872. <https://doi.org/10.1016/j.neuron.2013.12.013>
- 620 Donlea JM, Pimentel D, Talbot CB, Kempf A, Omoto JJ, Hartenstein V, Miesenböck G (2018)  
621 Recurrent Circuitry for Balancing Sleep Need and Sleep. *Neuron* 97:378-389.  
622 <https://doi.org/10.1016/j.neuron.2017.12.016>
- 623 Dubowy C, Sehgal A (2017) Circadian Rhythms and sleep in *Drosophila melanogaster*. *Genetics*  
624 205(4):1373-1397. <https://doi.org/10.1534/genetics.115.185157>
- 625 Feinberg EH, Vanhove MK, Bendesky A, Wang G, Fetter RD, Shen K, Bargmann CI (2008) GFP  
626 Reconstitution Across Synaptic Partners (GRASP) defines cell contacts and synapses in living  
627 nervous systems. *Neuron* 57:353–363. <https://doi.org/10.1016/j.neuron.2007.11.030>

- 628 Fogle KJ, Parson KG, Dahm NA, Holmes TC (2011) CRYPTOCHROME is a blue-light sensor that  
629 regulates neuronal firing rate. *Science* 331:1409-1413.  
630 <https://doi.org/10.1126/science.1199702>
- 631 Foltenyi K, Greenspan RJ, Newport JW (2007) Activation of EGFR and ERK by rhomboid  
632 signaling regulates the consolidation and maintenance of sleep in *Drosophila*. *Nat Neurosci*  
633 10:1160-1167. <https://doi.org/10.1038/nn1957>
- 634 Frenkel L, Muraro NI, Gonzáles ANB, Márcora MS, Bernabó G, Hermann-Luibl C, Romero JI,  
635 Helfrich-Förster C, Castano EM, Marino-Busjle C, Calvo DJ, Ceriani MF (2017) Organization of  
636 circadian behavior relies on glycinergic transmission. *Cell Reports* 19:72-85.  
637 <https://doi.org/10.1016/j.celrep.2017.03.034>
- 638 Friggi-Grelin F, Coulom H, Meller M, Gomez D, Hirsh J, Birman S (2002) Targeted gene  
639 expression in *Drosophila* dopaminergic cells using regulatory sequences from tyrosine  
640 hydroxylase. *J Neurobiol* 54:618–627. <https://doi.org/10.1002/neu.10185>
- 641 Glaser W (1978) *Varianzanalyse*. Gustav Fischer Verlag. Stuttgart, New York.
- 642 Gmeiner F, Kołodziejczyk A, Yoshii T, Rieger D, Nässel DR, Helfrich-Förster C (2013) GABA<sub>B</sub>  
643 receptors play an essential role in maintaining sleep during the second half of the night in  
644 *Drosophila melanogaster*. *J Exp Biol* 216(20):3837-3843. <https://doi.org/10.1242/jeb.085563>
- 645 Grima B, Chélot E, Xia R, Rouyer F (2004) Morning and Evening Peaks of Activity Rely on  
646 Different Clock Neurons of the *Drosophila* Brain. *Nature* 431(7010):869-73.  
647 <https://doi.org/10.1038/nature02935>
- 648 Gummadova JO, Coutts GA, Glossop NR (2009) Analysis of the *Drosophila* Clock promoter  
649 reveals heterogeneity in expression between subgroups of central oscillator cells and identifies  
650 a novel enhancer region. *J Biol Rhythms* 24(5):353-367.  
651 <https://doi.org/10.1177/0748730409343890>
- 652 Guo F, Yu J, Jung HJ, Abruzzi KC, Luo W, Griffith LC, Rosbash M (2016) Circadian neuron  
653 feedback controls the *Drosophila* sleep-activity profile. *Nature* 536, 292-297.  
654 <https://doi.org/10.1038/nature19097>
- 655 Guo F, Holla M, Díaz MM, Rosbash M (2018) A Circadian Output Circuit Controls Sleep-Wake  
656 Arousal in *Drosophila*. *Neuron* 100, 1–12. <https://doi.org/10.1016/j.neuron.2018.09.002>
- 657 Hamasaka Y, Nässel DR (2006) Mapping of serotonin, dopamine, and histamine in relation to  
658 different clock neurons in the brain of *Drosophila*. *J Comp Neurol* 494:314-330.  
659 <https://doi.org/10.1002/cne.20807>
- 660 Helfrich-Förster C (1995) The *period* clock gene is expressed in central nervous system neurons  
661 which also produce a neuropeptide that reveals the projections of circadian pacemaker cells  
662 within the brain of *Drosophila melanogaster*. *Proc Natl Acad Sci USA* 92:612-616.  
663 <https://doi.org/10.1073/pnas.92.2.612>
- 664 Helfrich-Förster C (2018) Sleep in insects. *Ann Rev Entomol* 63:69-86.  
665 <https://doi.org/10.1146/annurev-ento-020117-043201>.
- 666 Helfrich-Förster C, Shafer OT, Wülbeck C, Grieshaber E, Rieger D, Taghert P (2007)  
667 Development and morphology of the clock-gene-expressing Lateral Neurons of *Drosophila*  
668 *melanogaster*. *J Comp Neurol* 500:47-70. <https://doi.org/10.1002/cne.21146>
- 669 Hendricks JC, Finn SM, Panckeri KA, Chavkin J, Williams JA, Sehgal A, Pack AI (2000) Rest in  
670 *Drosophila* is a sleep-like state. *Neuron* 25:129-318. [https://doi.org/10.1016/S0896-6273\(00\)80877-6](https://doi.org/10.1016/S0896-6273(00)80877-6)  
671

- 672 Hermann-Luibl C, Yoshii T, Senthilan PR, Dirksen H, Helfrich-Förster C (2014) The Ion  
673 Transport Peptide is a new functional clock neuropeptide in the fruit fly *Drosophila*  
674 *melanogaster*. J Neurosci 34(29), 9522-9536. <https://doi.org/10.1016/j.cois.2014.11.003>
- 675 Joiner WJ, Crocker A, White BH, Sehgal A (2006) Sleep in *Drosophila* is regulated by adult  
676 mushroom bodies. Nature 441:757-760. <https://doi.org/10.1038/nature04811>
- 677 King AN, Sehgal A (2020) Molecular and circuit mechanisms mediating circadian clock output in  
678 the *Drosophila* brain. Eur J Neurosci 51(1):268-281. <https://doi.org/10.1111/ejn.14092>
- 679 Kula-Eversole E, Nagoshi E, Shang Y, Rodriguez J, Allada R (2010) Surprising gene expression  
680 patterns within and between PDF-containing circadian neurons in *Drosophila*. PNAS  
681 107:13497-13502. <https://doi.org/10.1073/pnas.1002081107>
- 682 Kume K, Kume S, Park SK, Hirsh J, Jackson FR (2005) Dopamine is a regulator of arousal in the  
683 fruit fly. J Neurosci 25:7377-7384. <https://doi.org/10.1523/JNEUROSCI.2048-05.2005>
- 684 Lebestky T, Chang JS, Dankert H, Zelnik L, Kim YC, Han KA, Wolf FW, Perona P, Anderson DJ  
685 (2009) Two different forms of arousal in *Drosophila* are oppositely regulated by the dopamine  
686 D1 receptor ortholog DopR via distinct neural circuits. Neuron 64:522-536.  
687 <https://doi.org/10.1016/j.neuron.2009.09.031>
- 688 Liang X, Ho MCW, Zhang Y, Li Y, Wu MN, Holy TE, Taghert PH (2019). Morning and Evening  
689 Circadian Pacemakers Independently Drive Premotor Centers via a Specific Dopamine Relay.  
690 Neuron 102(4):843-857. <https://doi.org/10.1016/j.neuron.2019.03.028>
- 691 Lima SQ, Miesenböck G (2005) Remote control of behavior through genetically targeted  
692 photostimulation of neurons. Cell 121(1):141-152. <https://doi.org/10.1016/j.cell.2005.02.004>
- 693 Liu S, Lamaze A, Liu Q, Tabuchi M, Yang Y, Fowler M, Bharadwaj R, Zhang J, Bedont J,  
694 Blackshaw S, Lloyd TE, Montell C, Sehgal A, Koh K, Wu MN (2014) WIDE AWAKE mediates the  
695 circadian timing of sleep onset. Neuron 82:151-166.  
696 <https://doi.org/10.1016/j.neuron.2014.01.040>
- 697 Liu S, Liu Q, Tabuchi M, Wu MN (2016). Sleep drive is encoded by neural plastic changes in a  
698 dedicated circuit. Cell 165:1347-1360. <https://doi.org/10.1016/j.cell.2016.04.013>
- 699 Liu Q, Liu S, Kodama MR, Driscoll MR, Wu MN (2012) Two dopaminergic neurons signal to the  
700 dorsal fan-shaped body to promote wakefulness in *Drosophila*. Curr Biol 22:2114-2123.  
701 <https://doi.org/10.1016/j.cub.2012.09.008>
- 702 Muraro N, Ceriani MF (2015) Acetylcholine from visual circuits modulates the activity of  
703 arousal neurons in *Drosophila*. J Neurosci 35(50):16315-16327.  
704 <https://doi.org/10.1523/JNEUROSCI.1571-15.2015>
- 705 Ni JD, Gurav AS, Liu W, Ogunmowo TH, Hackbart H, Elsheikh A, Verdegaal AA, Montell C (2019)  
706 Differential regulation of the *Drosophila* sleep homeostat by circadian and arousal inputs. Elife  
707 8:e40487. <https://doi.org/10.7554/eLife.40487>
- 708 Nikolaev VO, Bünemann M, Hein L, Hannawacker A, Lohse MJ (2004) Novel single chain cAMP  
709 sensors for receptor-induced signal propagation. J Biol Chem 279(36):37215-37218.  
710 <https://doi.org/10.1074/jbc.C400302200>
- 711 Nitz DA, van Swinderen B, Tononi G, Greenspan RJ (2002) Electrophysiological correlates of  
712 rest and activity in *Drosophila melanogaster*. Curr Biol 12:1934-1940.  
713 [https://doi.org/10.1016/s0960-9822\(02\)01300-3](https://doi.org/10.1016/s0960-9822(02)01300-3)
- 714 Osterwalder T, Yoon KS, White BH, Keshishian H (2001) A conditional tissue-specific transgene  
715 expression system using inducible GAL4. Proc Natl Acad Sci USA 98: 12596-12601.  
716 <https://doi.org/10.1073/pnas.221303298>

- 717 Parisky KM, Agosto J, Pulver SR, Shang Y, Kuklin E, Hodge JJ, Kang K, Liu X, Garrity PA, Rosbash  
718 M, Griffith LC (2008) PDF cells are a GABAresponsive wake-promoting component of the  
719 *Drosophila* sleep circuit. *Neuron* 60:672-682. <https://doi.org/10.1016/j.neuron.2008.10.042>
- 720 Park S, Sonn JY, Oh Y, Lim C, Choe J (2014). SIFamide and SIFamide receptor define a novel  
721 neuropeptide signaling to promote sleep in *Drosophila*. *Mol. Cells* 37:295-301.  
722 <https://doi.org/10.14348/molcells.2014.2371>
- 723 Pimentel D, Donlea JM, Talbot CB, Song SM, Thurston AJ, Miesenböck G (2016) Operation of a  
724 homeostatic sleep switch. *Nature* 536:333-337. <https://doi.org/10.1038/nature19055>
- 725 Pitman JL, McGill JJ, Keegan KP, Allada R (2006) A dynamic role for the mushroom bodies in  
726 promoting sleep in *Drosophila*. *Nature* 441:753-756. <https://doi.org/10.1038/nature04739>
- 727 Potdar S, Sheeba V (2018) Wakefulness is promoted during day time by PDFR signalling to  
728 dopaminergic neurons in *Drosophila melanogaster*. *eNeuro* 5(4): 0129-18.  
729 <https://doi.org/10.1523/ENEURO.0129-18>
- 730 Renn SC, Park JH, Rosbash M, Hall JC, Taghert PH (1999) A Pdf Neuropeptide Gene Mutation  
731 and Ablation of PDF Neurons Each Cause Severe Abnormalities of Behavioral Circadian  
732 Rhythms in *Drosophila*. *Cell* 99(7):791-802. [https://doi.org/10.1016/S0092-8674\(00\)81676-1](https://doi.org/10.1016/S0092-8674(00)81676-1)  
733 <https://doi.org/10.1523/JNEUROSCI.1234-05.2006>
- 734 Rieger D, Shafer OT, Tomioka K and Helfrich-Förster Ch (2006) Functional Analysis of Circadian  
735 Pacemaker Neurons in *Drosophila melanogaster*. *Journal of Neuroscience* 26 (9) 2531-2543.  
736 <https://doi.org/10.1523/JNEUROSCI.1234-05.2006>
- 737 Riemensperger T, Isabel G, Coulom H, Neuser K, Seugnet L, Kume K, Iché-Torres M, Cassar M,  
738 Strauss R, Preat T, Hirsh J, Birman S (2011) Behavioral consequences of dopamine deficiency in  
739 the *Drosophila* central nervous system. *PNAS* 108:834-839.  
740 <https://doi.org/10.1073/pnas.1010930108>
- 741 Ruben M, Drapeau MD, Mizrak D, Blau J (2012) A mechanism for circadian control of  
742 pacemaker neuron excitability. *J Biol Rhythms* 27:353-364.  
743 <https://doi.org/10.1177/0748730412455918>
- 744 Schlichting, Helfrich-Förster C (2015) Photic entrainment in *Drosophila* assessed by locomotor  
745 activity recordings. *Methods Enzymol.* 552:105-23.  
746 <https://doi.org/10.1016/bs.mie.2014.10.017>
- 747 Schlichting M, Menegazzi P, Lelito KR, Yao Z, Buhl E, Dalla Benetta E, Bahle A, Denike J, Hodge  
748 JLL, Helfrich-Förster C, Shafer OT (2016) A neural network underlying circadian entrainment  
749 and photoperiodic adjustment of sleep and activity in *Drosophila*. *J Neurosci* 36:9084-9096.  
750 <https://doi.org/10.1523/JNEUROSCI.0992-16.2016>
- 751 Schubert FK, Hagedorn N, Yoshii T, Helfrich-Förster C, Rieger D (2018) Neuroanatomical details  
752 of *Drosophila* lateral neurons support their functional role in the circadian system. *J Comp*  
753 *Neurol* 526(7):1209-1231. <https://doi.org/10.1002/cne.24406>
- 754 Shafer OT, Kim DJ, Dunbar-Yaffe R, Nikolaev VO, Lohse MJ, Taghert PH (2008) Shafer OT, Kim  
755 DJ, Dunbar-Yaffe R, Nikolaev VO, Lohse MJ, Taghert PH. *Neuron* 58(2):223-37.  
756 <https://doi.org/10.1016/j.neuron.2008.02.018>
- 757 Shang Y, Griffith LC, Rosbash M (2008) Light-arousal and circadian photoreception circuits  
758 intersect at the large PDF cells of the *Drosophila* brain. *PNAS* 105:19587-1994.  
759 <https://doi.org/10.1073/pnas.0809577105>

- 760 Shang Y, Haynes P, Pérez N, Harrington KI, Guo F, Pollack J, Hong P, Griffith LC, Rosbash M  
761 (2011) Imaging analysis of clock neurons reveals light buffers the wake-promoting effect of  
762 dopamine. *Nat Neurosci* 14:889-895. <https://doi.org/10.1038/nn.2860>
- 763 Shaw PJ, Cirelli C, Greenspan RJ, Tononi G (2000) Correlates of sleep and waking in *Drosophila*  
764 *melanogaster*. *Science* 287:1834-1837. <https://doi.org/10.1126/science.287.5459.1834>
- 765 Sheeba V, Fogle J, Kaneko M, Rashid S, Chou Y-T (2008a) Large ventral lateral neurons  
766 modulate arousal and sleep in *Drosophila*. *Curr Biol* 18:1537-1545.  
767 <https://doi.org/10.1016/j.cub.2008.08.033>
- 768 Sheeba V, Gu H, Sharma VK, O'Dowd DK, Holmes TC (2008b) Circadian- and light-dependent  
769 regulation of resting membrane potential and spontaneous action potential firing of  
770 *Drosophila* circadian pacemaker neurons. *J Neurophysiol* 99:976-988.  
771 <https://doi.org/10.1152/jn.00930.2007>
- 772 Stewart, BA, Atwood HL, Renger JJ, Wang J, Wu CF (1994) Improved stability of *Drosophila*  
773 larval neuromuscular preparations in haemolymph-like physiological solutions. *Journal of*  
774 *Comparative Physiology* 175, 179-191. <https://doi.org/10.1007/BF00215114>
- 775 Stoleru D, Peng Y, Agosto J, Rosbash M (2004) Coupled Oscillators Control Morning and  
776 Evening Locomotor Behaviour of *Drosophila*. *Nature* 431(7010):862-8.  
777 <https://doi.org/10.1038/nature02926>
- 778 Tabuchi M, Monaco JD, Duan G, Bell B, Liu S, Liu Q, Zhang K, Wu MN (2018). Clock-Generated  
779 Temporal Codes Determine Synaptic Plasticity to Control Sleep. *Cell* 175(5):1213-1227.  
780 <https://doi.org/10.1016/j.cell.2018.09.016>
- 781 Ueno T, Tomita J, Tanimoto H, Endo K, Ito K, Kume S, Kume K (2012). Identification of a  
782 dopamine pathway that regulates sleep and arousal in *Drosophila*. *Nat Neurosci* 15:1516-1523.  
783 <https://doi.org/10.1038/nn.3238>
- 784 Van Swinderen B, Nitz DA, Greenspan RJ (2004) Uncoupling of brain activity from movement  
785 defines arousal States in *Drosophila*. *Curr Biol* 14(2):81-87.  
786 <https://doi.org/10.1016/j.cub.2003.12.057>
- 787 Wang J, Ma X, Yang JS, Zheng X, Zugates CT, Lee CHJ, Lee T (2004)  
788 Transmembrane/juxtamembrane domain-dependent Dscam distribution and function during  
789 mushroom body neuronal morphogenesis. *Neuron* 43:663-672.  
790 <https://doi.org/10.1016/j.neuron.2004.06.033>
- 791 Wu MN, Koh K, Yue Z, Joiner WJ, Sehgal A (2008) A genetic screen for sleep and circadian  
792 mutants reveals mechanisms underlying regulation of sleep in *Drosophila*. *Sleep* 31:465-472.
- 793 Yuan Q, Lin F, Zeng X, Sehgal A (2005) Serotonin modulates circadian entrainment in  
794 *Drosophila*. *Neuron* 47(1):115-127. <https://doi.org/10.1093/sleep/31.4.465>
- 795 Yuan Q, Joiner WJ, Sehgal A (2006) A sleep-promoting role for the *Drosophila* serotonin  
796 receptor 1A. *Curr Biol* 16:1051-1062. <https://doi.org/10.1016/j.cub.2006.04.032>
- 797



798 **Table 1.** Rhythmic parameters of the free-running rhythms under constant darkness (DD)

|                                                           | rhythmic | period ( $\pm$ SD) | relative power ( $\pm$ SD) |
|-----------------------------------------------------------|----------|--------------------|----------------------------|
| <i>UAS-dicer2;clk856-Gal4;UAS-Dop1R1<sub>RNAi</sub></i>   | 94 %     | 23.82 $\pm$ 0.41   | 3950.63 $\pm$ 1145.38      |
| <i>UAS-dicer2;clk856-Gal4;UAS-Dop1R2<sub>RNAi</sub></i>   | 100 %    | 23.93 $\pm$ 0.40   | 4637.78 $\pm$ 1399.28      |
| <i>UAS-dicer2;clk856-Gal4;UAS-Dop1R1R2<sub>RNAi</sub></i> | 84 %     | 23.83 $\pm$ 0.44   | 2687.00 $\pm$ 772.08*      |
| <i>UAS-dicer2;clk856-Gal4</i>                             | 97 %     | 24.03 $\pm$ 0.46   | 3709.97 $\pm$ 1146.97      |
| <i>UAS-dicer2;Pdf-Gal4;UAS-Dop1R1<sub>RNAi</sub></i>      | 97 %     | 23.93 $\pm$ 0.33   | 6496.61 $\pm$ 1652.04      |
| <i>UAS-dicer2;Pdf-Gal4;UAS-Dop1R2<sub>RNAi</sub></i>      | 97 %     | 24.09 $\pm$ 0.41   | 5315.03 $\pm$ 2031.54      |
| <i>UAS-dicer2;Pdf-Gal4;UAS-Dop1R1R2<sub>RNAi</sub></i>    | 97 %     | 24.00 $\pm$ 0.31   | 3752.74 $\pm$ 1485.88      |
| <i>UAS-dicer2;Pdf-Gal4</i>                                | 100 %    | 24.31 $\pm$ 0.34   | 6966.94 $\pm$ 1699.23      |
| <i>UAS-dicer2;;UAS-Dop1R1<sub>RNAi</sub></i>              | 100 %    | 23.70 $\pm$ 0.42   | 4812.78 $\pm$ 1702.03      |
| <i>UAS-dicer2;;UAS-Dop1R2<sub>RNAi</sub></i>              | 100 %    | 23.75 $\pm$ 0.26   | 4198.81 $\pm$ 1351.07      |
| <i>UAS-dicer2;;UAS-Dop1R1R2<sub>RNAi</sub></i>            | 100 %    | 23.66 $\pm$ 0.34   | 4135.06 $\pm$ 1298.63      |
| <i>UAS-dicer2;Pdf-GS;UAS-Dop1R1<sub>RNAi</sub> + Eth</i>  | 100 %    | 23.74 $\pm$ 0.35   | 2833.94 $\pm$ 720.94       |
| <i>UAS-dicer2;Pdf-GS;UAS-Dop1R1<sub>RNAi</sub> + RU</i>   | 100 %    | 24.18 $\pm$ 0.54** | 2668.28 $\pm$ 365.25       |
| <i>UAS-dicer2;Pdf-GS;UAS-Dop1R2<sub>RNAi</sub> + Eth</i>  | 94 %     | 23.84 $\pm$ 0.34   | 3886.97 $\pm$ 978.24       |
| <i>UAS-dicer2;Pdf-GS;UAS-Dop1R2<sub>RNAi</sub> + RU</i>   | 97 %     | 24.87 $\pm$ 0.52** | 2865.97 $\pm$ 461.19       |
| <i>UAS-dicer2;Pdf-GS + Eth</i>                            | 100 %    | 23.76 $\pm$ 0.24   | 4120.34 $\pm$ 715.72       |
| <i>UAS-dicer2;Pdf-GS + RU</i>                             | 100 %    | 24.46 $\pm$ 0.42** | 4332.97 $\pm$ 894.48       |
| <i>UAS-dicer2;;UAS-Dop1R1<sub>RNAi</sub> + Eth</i>        | 100 %    | 23.84 $\pm$ 0.34   | 3686.97 $\pm$ 978.24       |
| <i>UAS-dicer2;;UAS-Dop1R1<sub>RNAi</sub> + RU</i>         | 100 %    | 23.89 $\pm$ 0.25   | 3608.44 $\pm$ 830.90       |
| <i>UAS-dicer2;;UAS-Dop1R2<sub>RNAi</sub> + Eth</i>        | 100 %    | 23.81 $\pm$ 0.30   | 3433.91 $\pm$ 859.93       |
| <i>UAS-dicer2;;UAS-Dop1R2<sub>RNAi</sub> + RU</i>         | 100 %    | 23.81 $\pm$ 0.36   | 3526.28 $\pm$ 582.67       |

799 \* significant differences ( $p < 0.05$ ) in power between flies with down-regulated dopamine  
800 receptors in all clock neurons in comparison to the relevant controls

801 \*\* highly significant differences ( $p < 0.01$ ) after RU application in the *Pdf*-GeneSwitch (GS)  
802 experiments

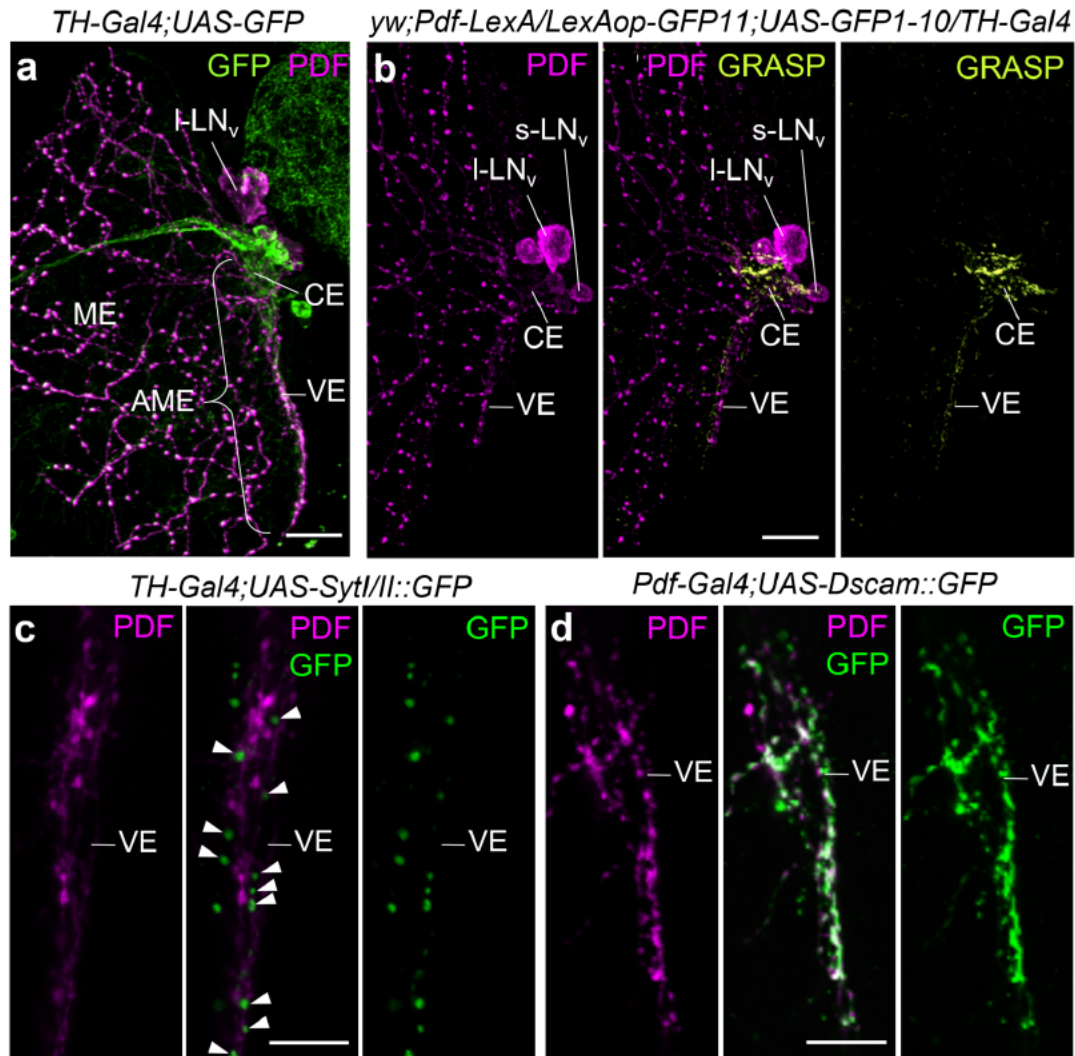

**Figure 1.** Staining of whole-mount brains showing the spatial vicinity of dopaminergic neurites (visualized with *TH-Gal4*) and neurites from the PDF-positive LN<sub>s</sub> in the accessory medulla of one hemisphere. All pictures are overlays of 2 μm thick confocal stacks. **(a)** Medulla (ME) and accessory medulla (AME) labeled with anti-PDF (magenta) and anti-GFP (*TH-Gal4;UAS-10xmyrGFP*, green) (overlay of 10 confocal stacks). *TH-Gal4* and PDF overlap in the central part (CE) and ventral elongation (VE) of the AME. I-LN<sub>v</sub>s, PDF-positive large ventrolateral neurons; s-LN<sub>v</sub>s, PDF-positive small ventrolateral neurons. **(b)** GFP Reconstitution Across Synaptic Partners (GRASP) between *Pdf-Gal4* neurons and *TH-Gal4* neurons. GRASP signals are found in the CE and VE of the AME (overlay of 6 confocal sections). **(c)** Expression of the presynaptic marker Synaptotagmin::GFP (*Syt1/II::GFP*) in the *TH-Gal4* neurons (GFP; green) and co-staining against PDF (magenta) (overlay of 3 confocal stacks). GFP-positive vesicles (arrowheads) are present along the PDF-positive fibers in the VE. **(d)** Expression of the postsynaptic marker *Dscam::GFP* (green) in the *Pdf-Gal4*-positive I-LN<sub>v</sub>s and co-staining with anti-PDF (magenta) (overlay of 3 confocal stacks). The PDF-positive fibers in the VE of the AME are predominantly dendritic. Scale bars = 20 μm in **a** and **b**, and 10 μm in **c** and **d**.

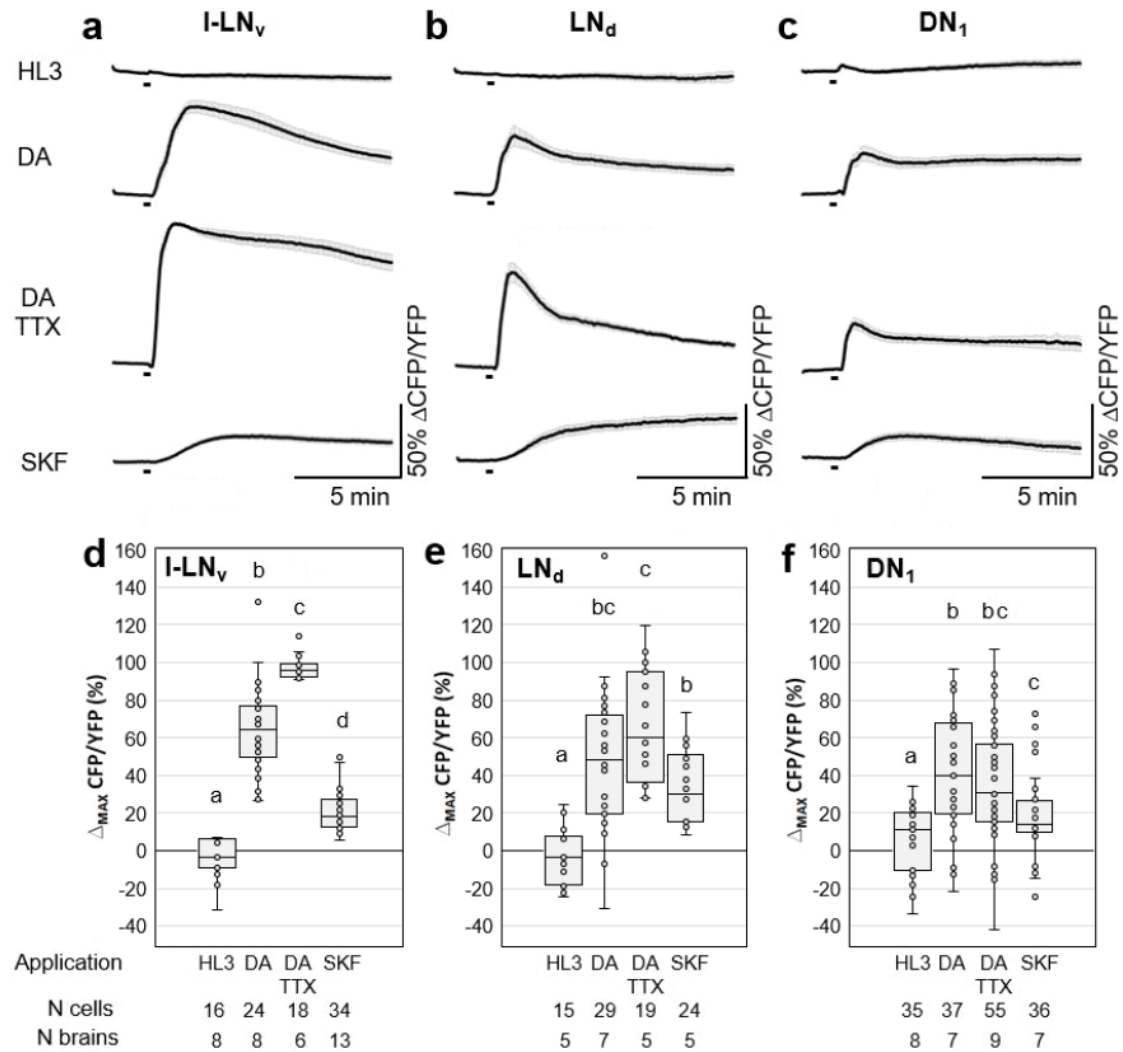

**Figure 2.** *Ex vivo* live-cAMP imaging on *Drosophila* clock neurons. (a-c) Mean inverse FRET traces of I-LN<sub>v</sub>, LN<sub>d</sub> and DN<sub>1</sub> clock neurons of *clk856> Epac1* flies. Error bars (grey) represent SEM and short black bars indicate application of the different solutions: HL3 = buffer (negative control), DA (= 1 mM dopamine), DA+TTX (= 1 mM DA + 2 μM Tetrodotoxin) and SKF<sup>38393</sup> (= 0.1 mM Dop1R1-agonist), respectively. (d-f) Quantification of maximum inverse FRET changes for each single neuron (dots in Box Plots) of each treatment. Black horizontal lines in the Box Plots represent the median, different letters indicate significant differences. Cells of all three neuronal clusters respond with robust and significant increases in cAMP levels upon application of DA and DA+TTX compared to negative controls, indicating a direct neuronal connection between dopaminergic neurons and clock neurons. Application of the Dop1R1-agonist SKF also significantly increased cAMP levels in all three clusters of clock neurons (f).



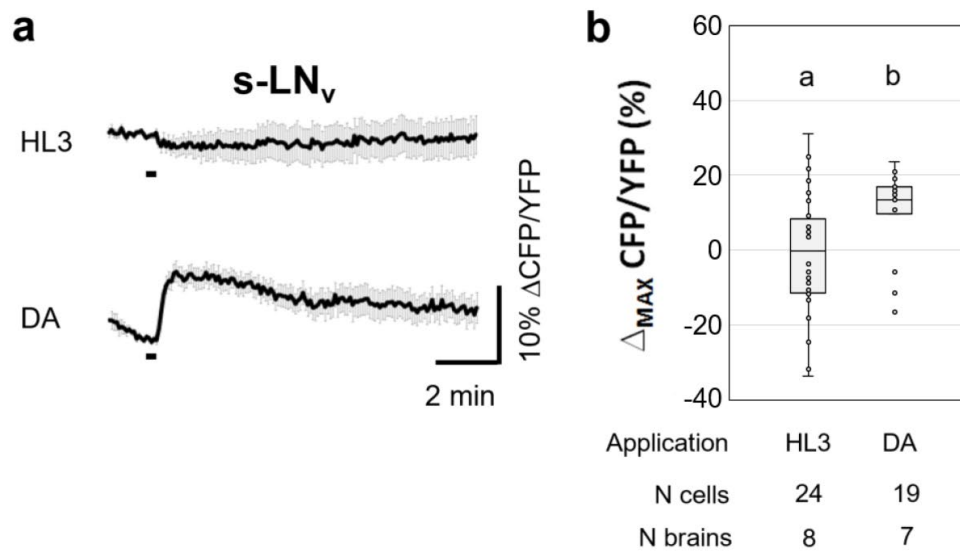

**Figure 3.** Ex vivo live-cAMP imaging on *Drosophila* s-LN<sub>v</sub> neurons. **(a)** Mean inverse FRET traces of s-LN<sub>v</sub> clock neurons of *clk856>Epac* flies. Error bars (grey) represent SEM and short black bars indicate application of negative control (HL3) or 1 mM dopamine (DA). **(b)** Quantification of maximum inverse FRET changes for each single neuron (dots in Box Plots) of each treatment. Black horizontal lines in the Box Plots represent the median, different letters indicate significant differences. s-LN<sub>v</sub>s significantly responded to DA with an increase in cAMP. In this case the Mann–Whitney U test was used for pairwise comparison of maximum changes.

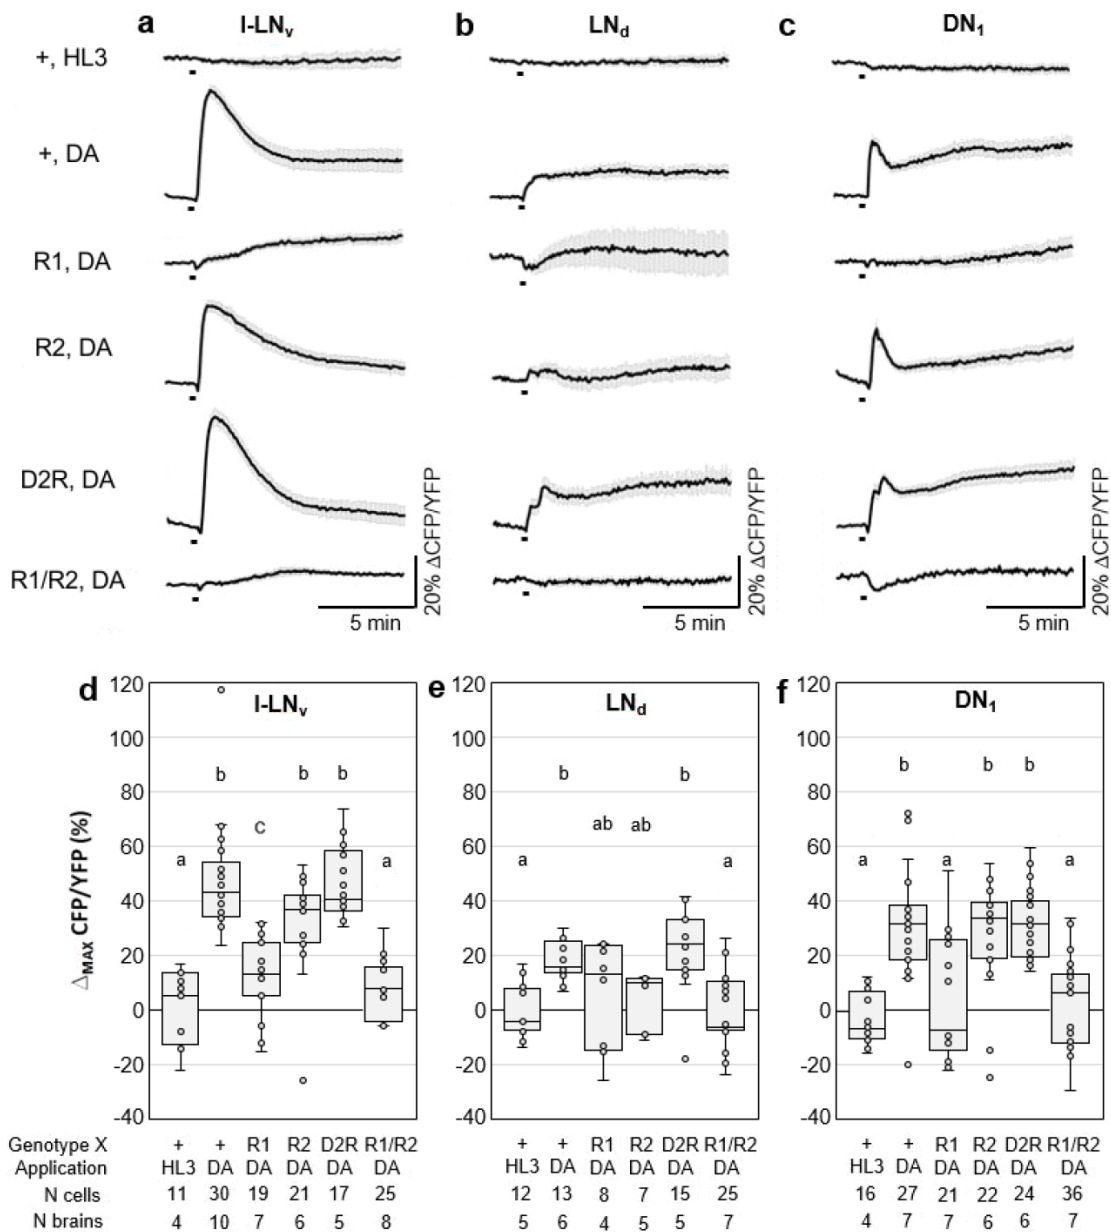

**Figure 4.** *Ex vivo* live-cAMP imaging on *Drosophila* clock neurons expressing RNAi-constructs against different Dopamine receptors. (a-c) Mean inverse FRET traces of I-LN<sub>v</sub>, LN<sub>d</sub> and DN<sub>1</sub> clock neurons of *clk856>dicer2, Epac1, X<sub>RNAi</sub>* flies. The X stands for 'wildtype' (+) or the relevant dopamine receptor RNAi lines: R1 = *Dop1R1<sub>RNAi</sub>*, R2 = *Dop1R2<sub>RNAi</sub>*, D2R = *D2R<sub>RNAi</sub>* and R1/R2 = *Dop1R1<sub>RNAi</sub>/Dop1R2<sub>RNAi</sub>*. Error bars (grey) represent SEM and short black bars indicate application of negative control (HL3) or 1 mM dopamine (DA). (d-f) Quantification of maximum inverse FRET changes for each single neuron (dots in Box Plots) of each treatment. Black horizontal lines in the Box Plots represent the median, different letters indicate significant differences. DN<sub>1</sub> neurons responded significantly to application of DA, except when *Dop1R1* or *Dop1R1/R2* were knocked down. I-LN<sub>v</sub> neurons lacked the responses to dopamine when both dopamine receptors (*Dop1R1/R2*) were knocked down. Responses of the LN<sub>d</sub> were not different from negative controls when either *Dop1R1* or *Dop1R2* or both (*Dop1R1/R2*) were knocked down.

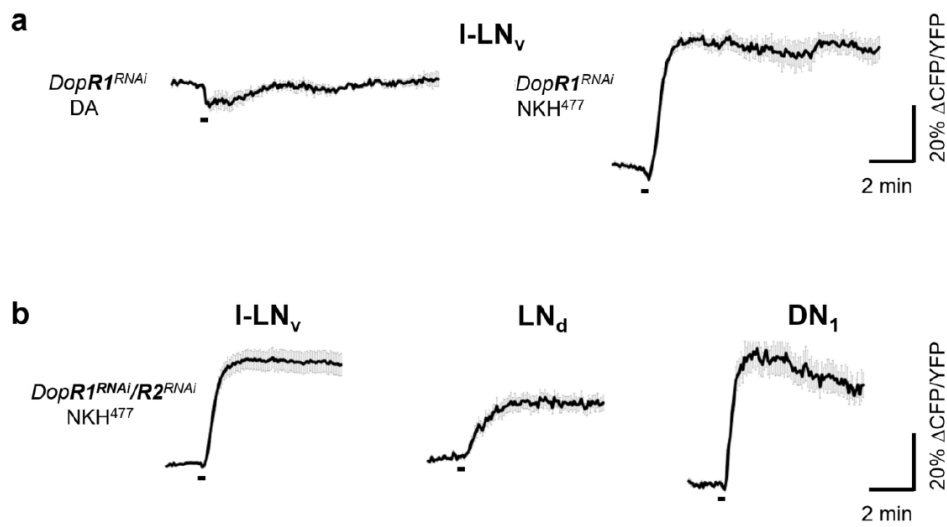

**Figure 5.** *Ex vivo* live-cAMP imaging on *Drosophila* clock neurons expressing RNAi-constructs against different dopamine receptors (*clk856>dicer2,Epac1;Dop1RX<sub>RNAi</sub>* flies). (a) Mean inverse FRET traces of I-LN<sub>v</sub> clock neurons with down-regulated Dop1R1 (*Dop1R1<sub>RNAi</sub>*). The same set of neurons (5 neurons from 2 brains) was first subject to 1 mM dopamine (DA) application showing no response and afterwards to application of 10 μM of the adenylate-cyclase activator NKH<sup>477</sup>, which evoked an increase in cAMP. (b) Mean inverse FRET traces of the same I-LN<sub>v</sub>, LN<sub>d</sub> and DN<sub>1</sub> clock neurons shown in Fig. 4a, b, c (bottom) expressing *DopR1<sub>RNAi</sub>/DopR2<sub>RNAi</sub>* after application of NKH<sup>477</sup>. Error bars (grey) represent SEM and short black bars indicate application of negative control (HL3) or 1 mM dopamine (DA).

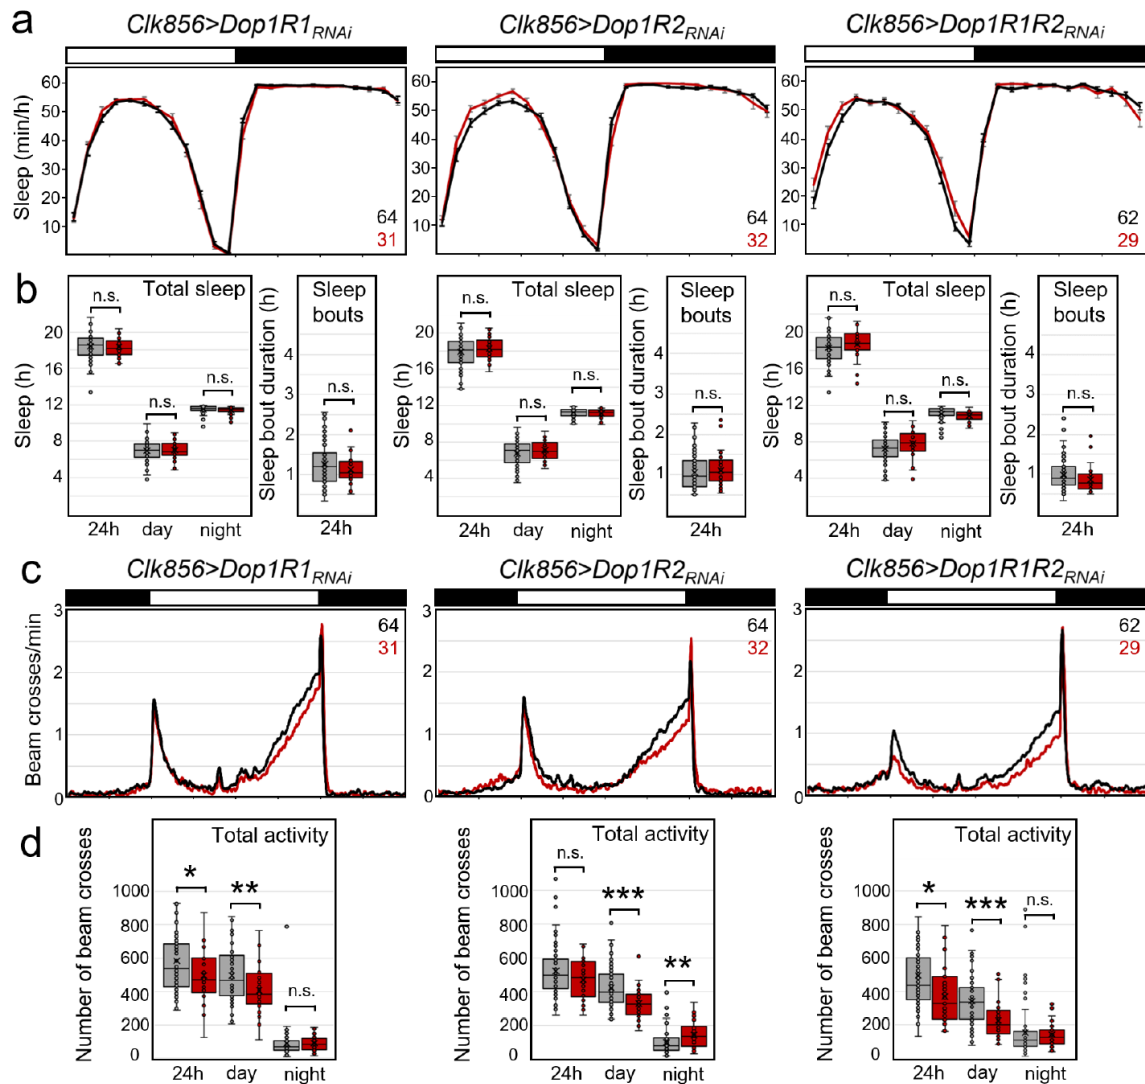

**Figure 6.** Sleep and activity in clock neuron specific dopamine-receptor knockdown flies. Dop1R1, Dop1R2 or both were knocked down using *clk856-Gal4*. **(a)** Average daily sleep profiles of experimental flies (red, *clk856>Dop1R<sub>RNAi</sub>*) and respective *Gal4* and *UAS* controls (pooled in black; controls were not significantly different from each other and were pooled in a single). **(b)** Box Plots of sleep parameters (total sleep in hours during the entire 24 h period, during the day and the night; same color code as in a). The median, upper and lower quartiles as well as upper and lower extremes plus the single data points are plotted. No significant differences were observed between experimental flies and controls in any of the three cases. **(c)** Average activity profiles of the same flies that are depicted in a. The flies with down-regulated dopamine receptors were always less active during day as compared to the controls. **(d)** Box Plots of total activity during the entire 24 h period, during the day and the night. Significant differences are indicated by asterisks (\*  $p < 0.05$ ; \*\*  $p < 0.01$ ; \*\*\*  $p < 0.001$ ). The numbers of tested flies are indicated in (a) and (c).

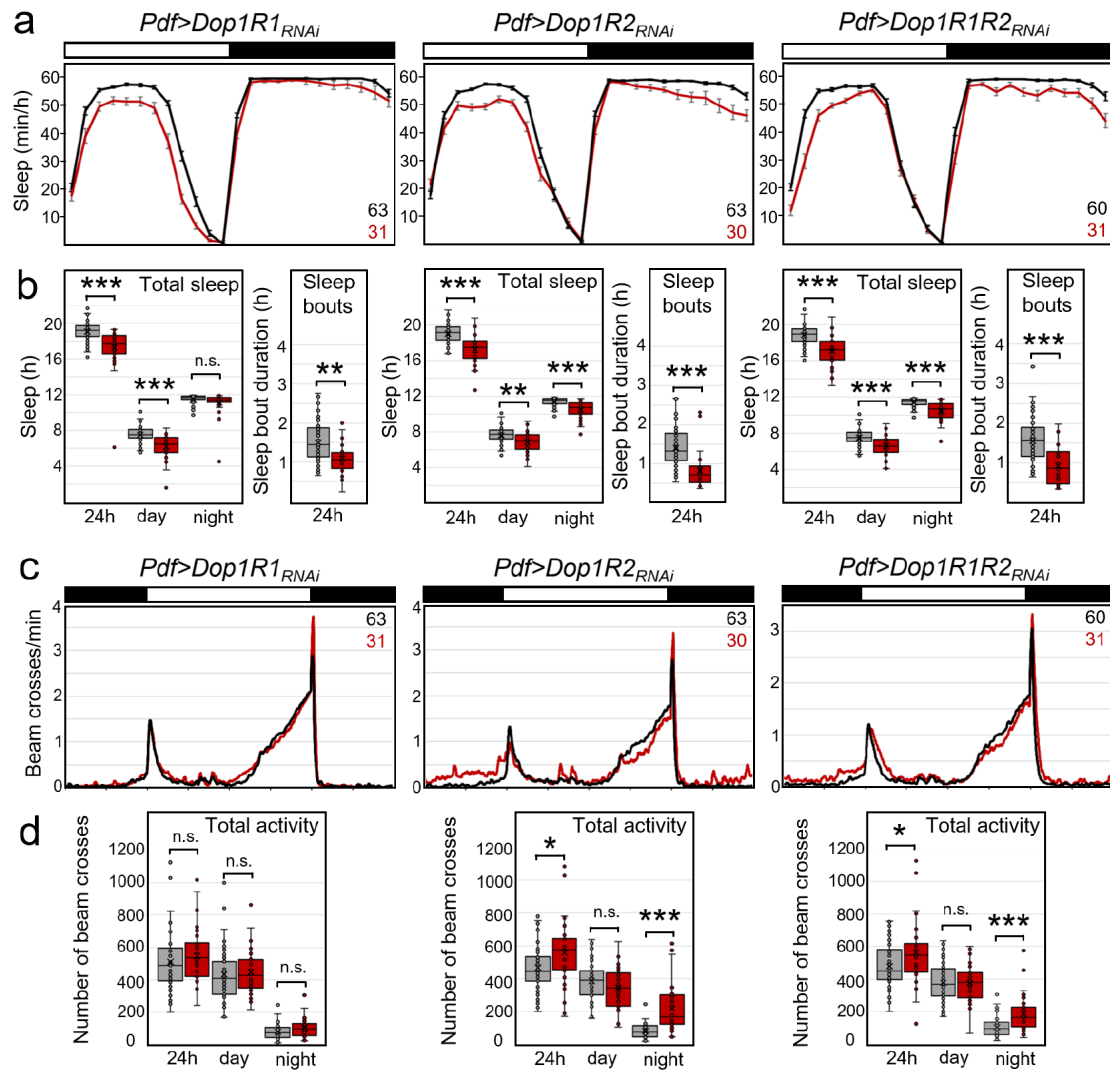

**Figure 7.** Sleep and activity in PDF-neuron specific dopamine-receptor knockdown flies. Dop1R1, Dop1R2 or both were knocked down using *Pdf-Gal4*. **(a)** Average daily sleep profiles of experimental flies (red, *Pdf>Dop1R<sub>RNAi</sub>*) and respective *Gal4* and *UAS* controls (pooled in black; both controls showed significantly more sleep than the flies with dopamine receptor knockdown; therefore they were pooled). **(b)** Box Plots of sleep parameters as shown in Fig. 6. Flies showed significantly less total sleep and shorter sleep bouts, when either Dop1R1 or Dop1R2 or both were knocked down in the PDF-neurons. Knockdown of Dop1R1 decreased daytime sleep, whereas knockdown of Dop1R2 and simultaneous knockdown of both receptors decreased day- and night-time sleep. **(c)** Average activity profiles of the same flies that are depicted in **a**. The flies with down-regulated Dop1R2 receptor were more active than the controls. **(d)** Box Plots of total activity during the entire 24 h period, during the day and the night. Significant differences are indicated by asterisks (\*  $p < 0.05$ ; \*\*  $p < 0.01$ ; \*\*\*  $p < 0.001$ ). The numbers of tested flies are indicated in **(a)** and **(c)**.

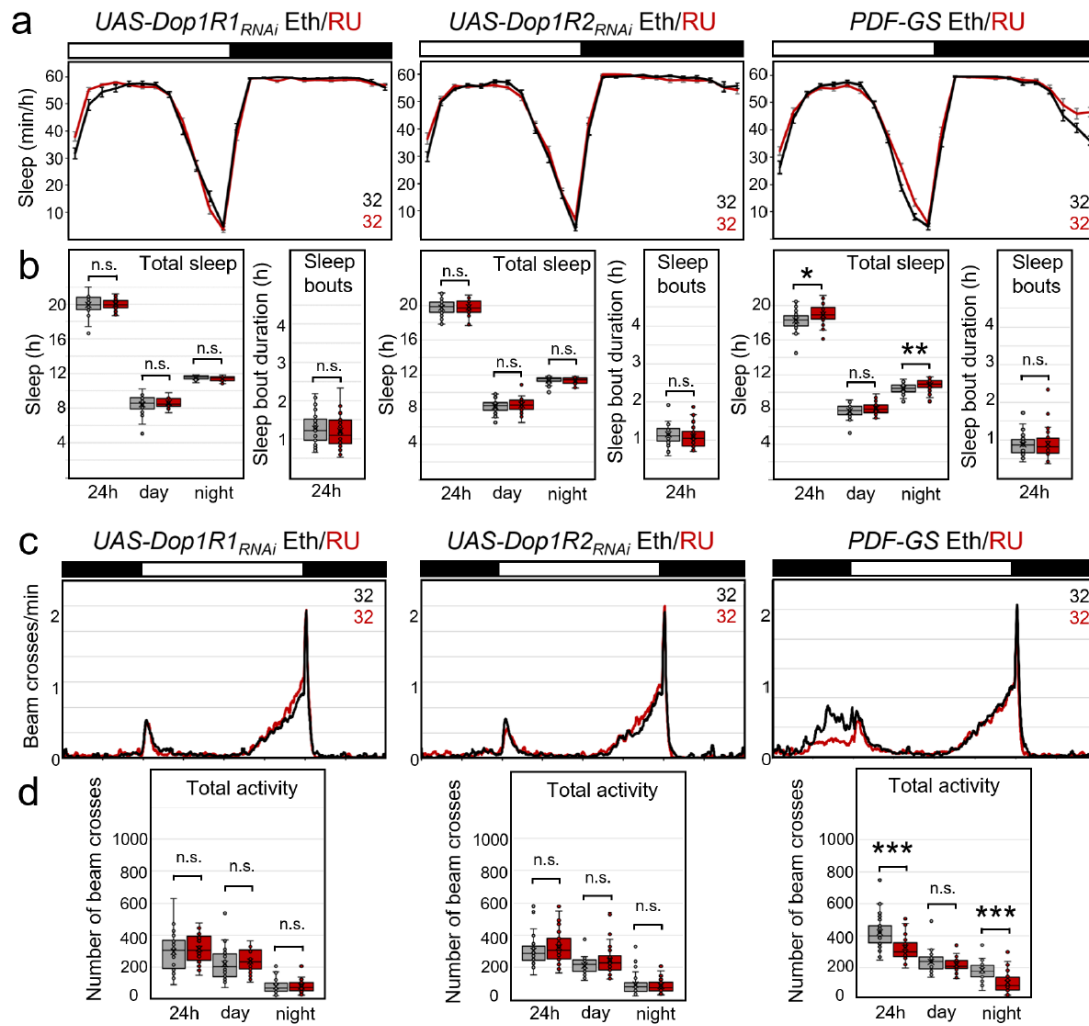

**Figure 8.** Sleep and activity in control flies fed with RU dissolved in ethanol or only with ethanol. **(a)** Average daily sleep profiles of flies fed with RU in ethanol (red) and flies fed only with ethanol (black). **(b)** Box Plots of sleep parameters. **(c)** Average activity profiles of the same flies that are depicted in **a**. **(d)** Box Plots of total activity during the entire 24 h period, during the day and the night. Significant differences are indicated by asterisks (\*  $p < 0.05$ ; \*\*  $p < 0.01$ ; \*\*\*  $p < 0.001$ ). Feeding of RU affected sleep and activity marginally. Only *Pdf-Gal4* flies fed with RU slept significantly more and were less active in the night than flies fed only with ethanol. The numbers of tested flies are indicated in **(a)** and **(c)**.

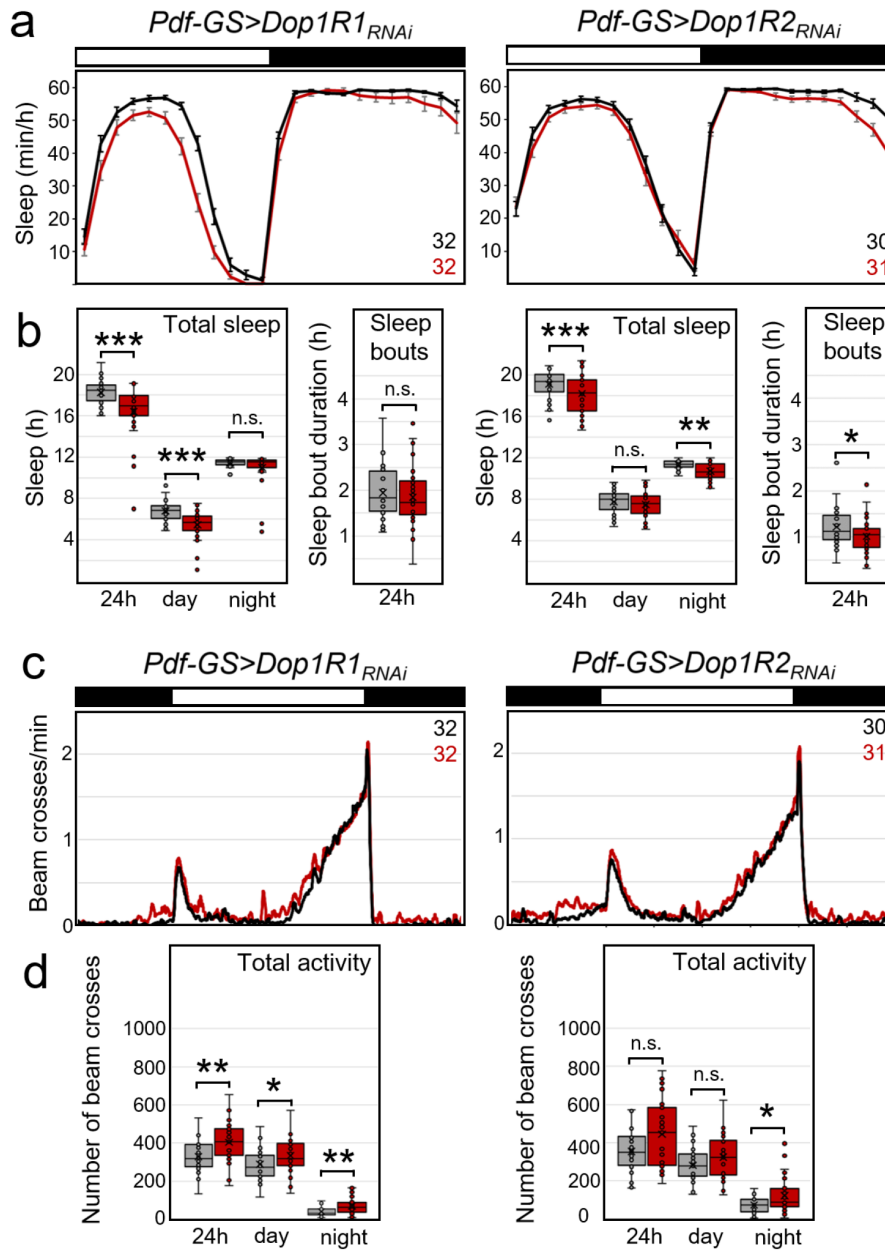

**Figure 9.** Sleep and activity in flies with conditional dopamine-receptor knockdown in the PDF-neurons (with *Pdf-GS*). **(a)** Average daily sleep profiles of experimental flies (red, *Pdf-GS>Dop1R<sub>RNAi</sub>* fed with RU in ethanol) and control flies (black, *Pdf-GS>Dop1R<sub>RNAi</sub>* fed with ethanol). **(b)** Box Plots of sleep parameters. Flies showed significantly less total sleep when either Dop1R1 or Dop1R2 or both were knocked down in the PDF-neurons. Knockdown of Dop1R1 decreased daytime sleep, whereas knockdown of Dop1R2 decreased nighttime sleep. Sleep bouts were only significantly affected after knockdown of the Dop1R2 receptor. **(c)** Average activity profiles of the same flies that are depicted in **a**. The flies with down-regulated dopamine receptors were generally more active than the controls. **(d)** Box Plots of total activity during the entire 24 h period, during the day and the night. Significant differences are indicated by asterisks (\*  $p < 0.05$ ; \*\*  $p < 0.01$ ; \*\*\*  $p < 0.001$ ). The numbers of tested flies are indicated in **(a)** and **(c)**.



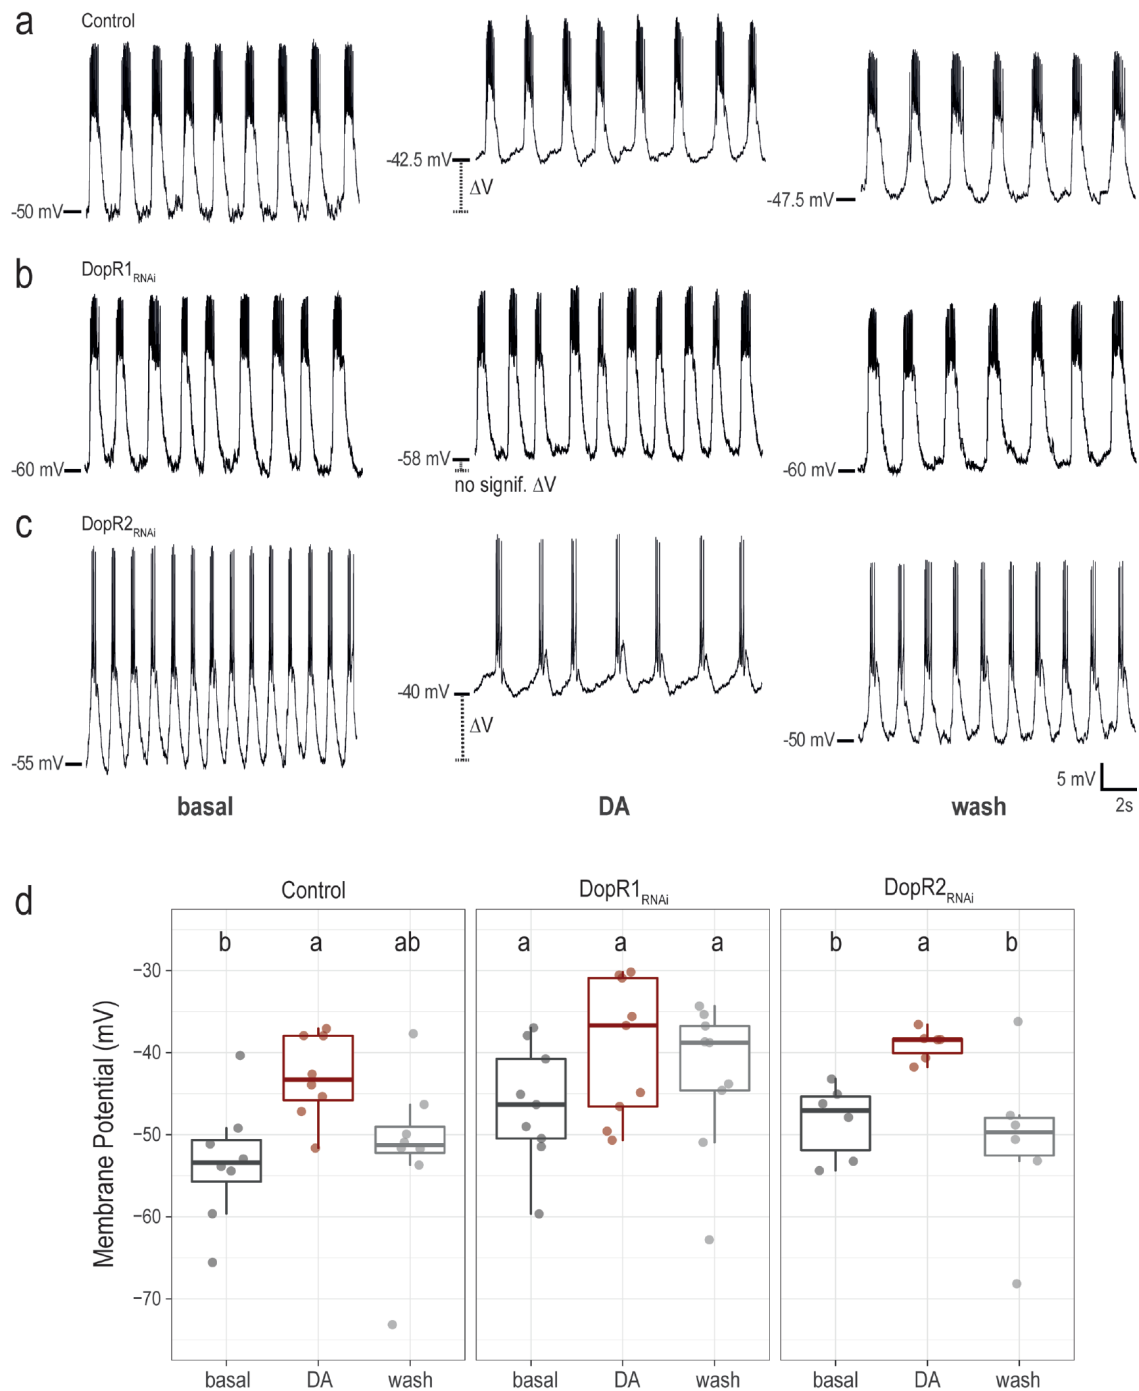

**Figure 10.** Dop1R1 receptor mediates I-LN<sub>v</sub> responses to dopamine. **(a), (b), (c).** Representative traces of whole-cell patch clamp recordings during basal conditions (perfusion of external saline, left panels), DA (perfusion of 1 mM dopamine, middle panels) and wash out (perfusion of external saline, right panels). **(a)** Control group, *Pdf-Gal4,UAS-dicer;pdf Red>+*. **(b)**, *Dop1R1<sub>RNAi</sub>* group, *Pdf-Gal4,UAS-dicer2;pdf Red>UAS-Dop1R1<sub>RNAi</sub>*. **(c)**, *Pdf-Gal4,UAS-dicer2;pdf Red>UAS-Dop1R2<sub>RNAi</sub>*. **(d)** Boxplots showing the value of membrane potential in mV for the same genotypes in each condition (basal, DA, wash). Kruskal-Wallis non-parametric test with Bonferroni correction was applied for statistical analysis. The alpha parameter was 0.05. Different letters indicate significant differences. Control, n=8. DopR1<sub>RNAi</sub>, n=9. DopR2<sub>RNAi</sub>, n=6.



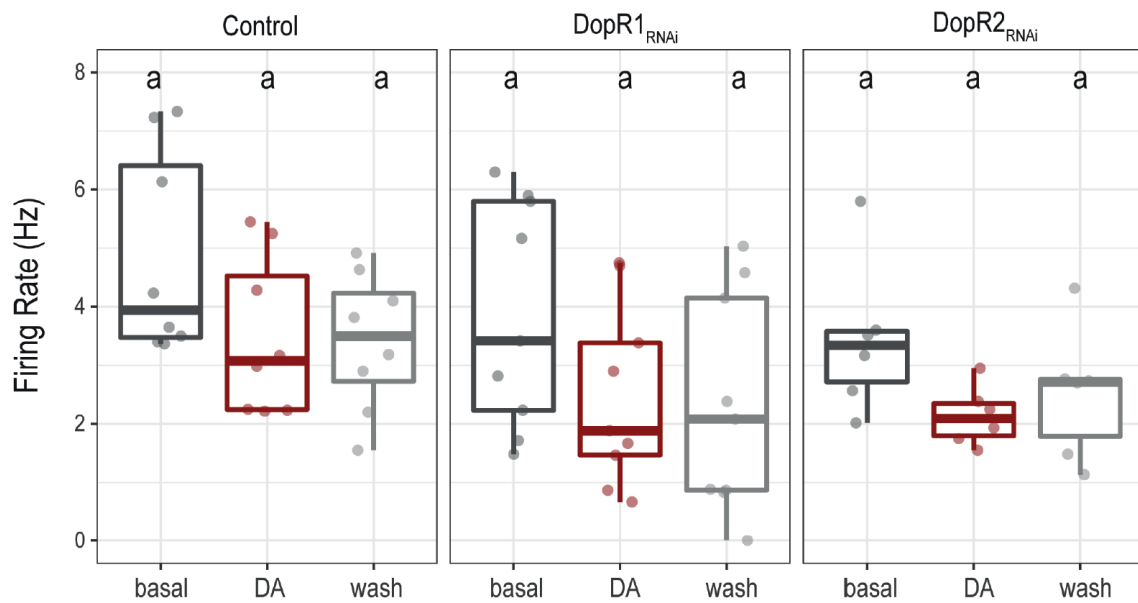

**Figure 11.** Boxplots showing the value of firing rate (number of action potentials per second) obtained in whole-cell patch clamp configuration under three different conditions (basal, Dopamine, wash) for Pdf-Gal4,UAS-dicer;pdf Red>+ (Control, left panel), DopR1RNAi group, Pdf-Gal4,UAS-dicer;pdf Red>UAS-Dop1R1RNAi (DopR1RNAi, middle panel), Pdf-Gal4,UAS-dicer;pdf Red>UAS-Dop1R2RNAi (Dop1R2RNAi, right panel). Kruskal-Wallis non-parametric test with Bonferroni correction was applied for statistical analysis. The alpha parameter was 0.05. No statistically significant differences were found (same letter indicate no significant differences). Control, n=8. Dop1R1RNAi , n=9. Dop1R2RNAi, n=6.
